# Supplementary material for: Synthesis and properties ofp-benzithiahexaphyrin(1.1.1.1.1.1)s
Source: Royal Society of Chemistry journal article supplement (doi:10.1039/d2nj05085d), 2023-01-01
Supplement: d2nj05085d1.pdf [file d2nj05085d1.pdf]

## Supporting Information

### Synthesis and Properties of *p*-Benzithiahexaphyrin(1.1.1.1.1)s

Pooja Varak, Avisikta Sinha and Mangalampalli Ravikanth\*

Department of Chemistry, Indian Institute of Technology Bombay, Powai, Mumbai 400076,  
India, E-mail: [ravikanth@chem.iitb.ac.in](mailto:ravikanth@chem.iitb.ac.in)

---

| Sr. no | Details                                                                                                       | Page no. |
|--------|---------------------------------------------------------------------------------------------------------------|----------|
| 2      | <b>Figures S1-S35.</b> Characterization (HR-MS and NMR) data for all new compounds.                           | S2-S36   |
| 3      | <b>Figures S36.</b> Absorption spectra for compounds <b>5-8</b> with and without TFA.                         | S37      |
| 4      | <b>Figures S37.</b> Electrochemical data for the compounds <b>5-8</b> .                                       | S38      |
| 5      | <b>Figure S38-S39.</b> NICS(0) values for compounds <b>5-8</b> .                                              | S39-S40  |
| 6      | <b>Table S1.</b> Selected TD-DFT and calculated oscillator strengths for electronic transitions of <b>5</b> . | S41-S42  |
| 7      | <b>Table S2, S3.</b> Cartesian coordinates of the optimized ( $S_0$ ) geometries of the compound <b>5</b> .   | S43-S45  |

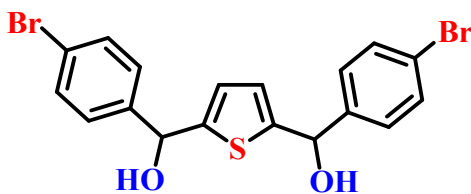

Compound 14b

Department of Chemistry I.I.T. (B)

## Sample Information

|                |            |                    |                                                                                             |
|----------------|------------|--------------------|---------------------------------------------------------------------------------------------|
| Name           | MR-PV-TBDO | Data File Path     | D:\MassHunter\Data\JULY-22\MR-PV-TBDO.d                                                     |
| Sample ID      |            | Acq. Time (Local)  | 25-07-2022 4:33:18 PM (UTC+05:30)                                                           |
| Instrument     | LCMS QTOF  | Method Path (Acq)  | D:\MassHunter\Methods\6545XT_checkout\Methods\TRAINING\MS_SCAN_AB_POS_100-600_4000-500-80.m |
| MS Type        | QTOF       | Version (Acq SW)   | 6200 series TOF/6500 series Q-TOF B.09.00 (B9044.0)                                         |
| Inj. Vol. (ul) | 2          | IRM Status         | Success                                                                                     |
| Position       | P1-F8      | Method Path (DA)   | D:\MassHunter\Report Templates\REPORT_METHOD\HRMS.m                                         |
| Plate Pos.     |            | Target Source Path |                                                                                             |
| Operator       |            | Result Summary     | 1 qualified (1 targets)                                                                     |

## Sample Spectra

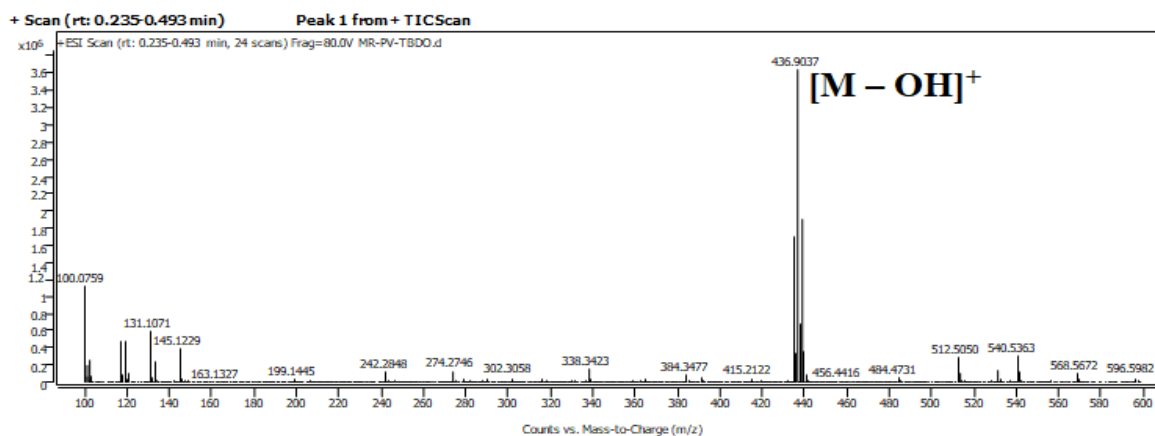

## Compound Details

Cpd. 1: C18H14Br2O2S

| Formula      | m/z      | Observed M/Z     | Difference Da      | Difference PPM     | Score |
|--------------|----------|------------------|--------------------|--------------------|-------|
| C18H14Br2O2S | 476.8955 | 476.895499668709 | 0.0215608527582845 | 0.0477106993816943 | 96.87 |

## Compound Spectra (Zoomed)

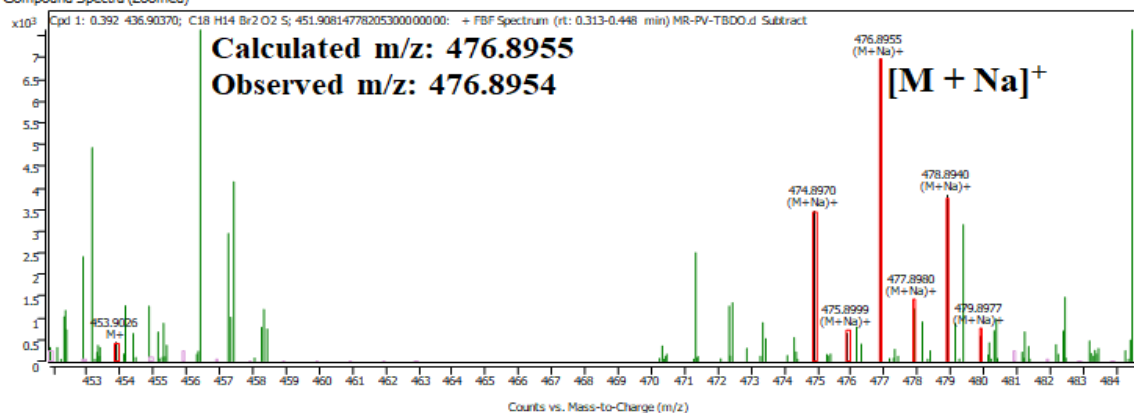

Figure S1. HR mass spectrum of the compound 14b.

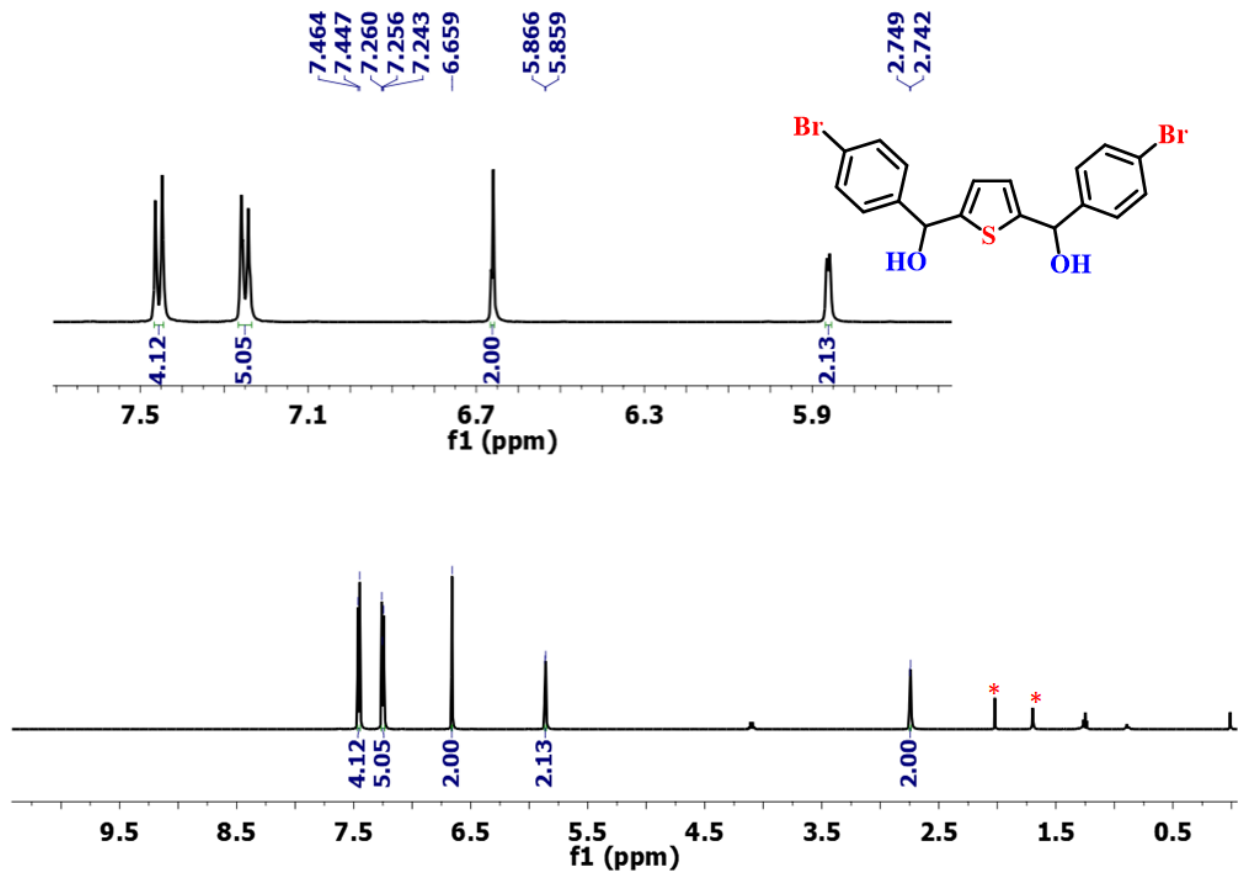

**Figure S2.** <sup>1</sup>H NMR spectrum of the compound **14b** recorded in CDCl<sub>3</sub> on 500 MHz NMR instrument. Note: Peaks marked with asterisk (\*) are due to residual solvents.

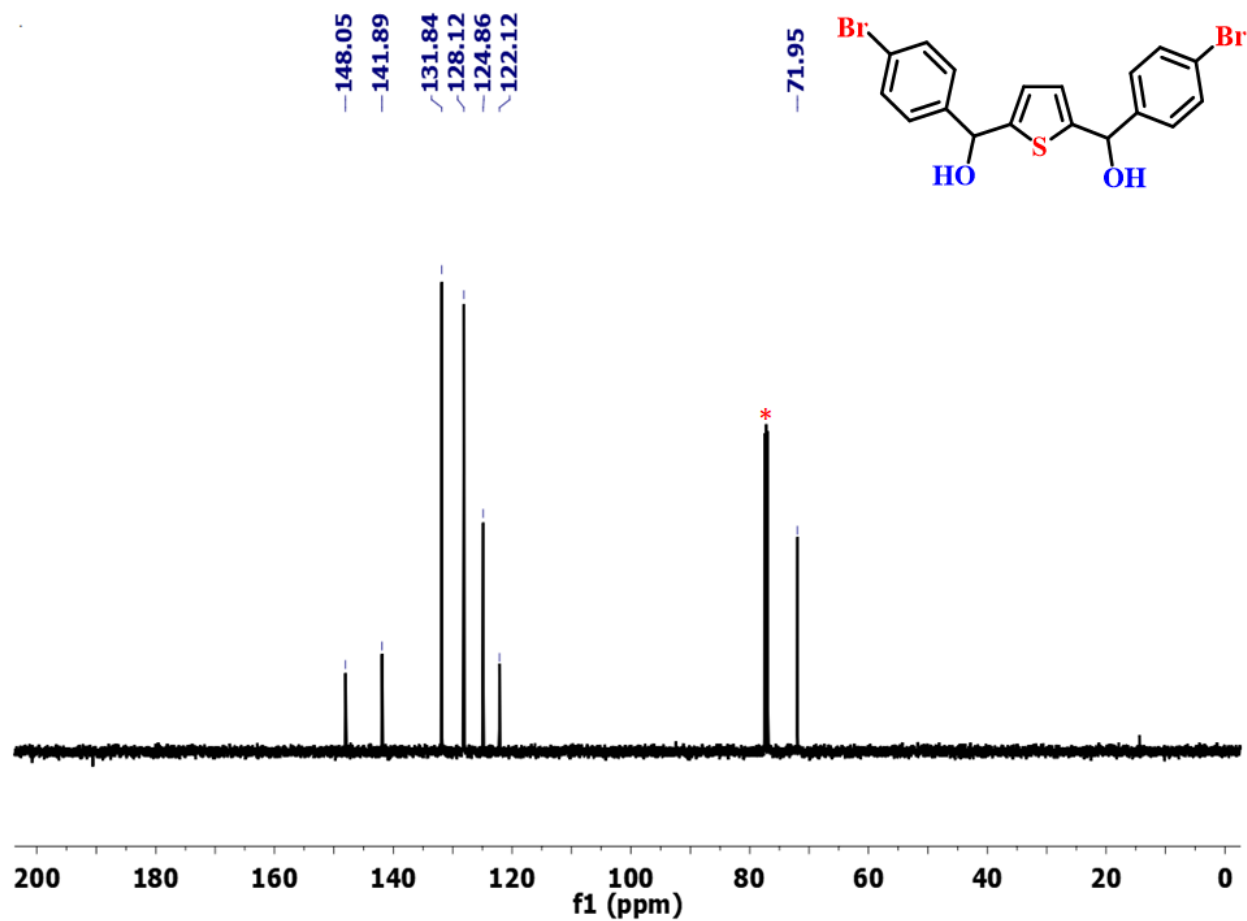

**Figure S3.**  $^{13}\text{C}\{^1\text{H}\}$  NMR spectrum of the compound **14b** recorded in  $\text{CDCl}_3$  on 500 MHz NMR instrument. Note: Peaks marked with asterisk (\*) are due to residual solvents.

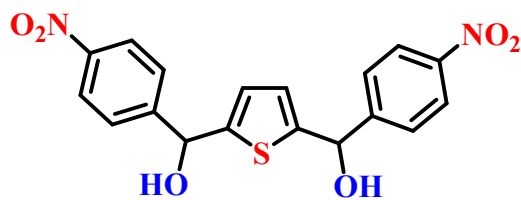

Compound 14d

DEPARTMENT OF CHEMISTRY, I.I.T.(B)

**Analysis Info**

Analysis Name D:\Data\SEP-2022\MR-PV-TNDO111.d  
 Method Naformat\_pos\_50-600.m  
 Sample Name MR-PV-TNDO111  
 Comment C18H14N2O6S

Acquisition Date 9/9/2022 12:21:35 PM

Operator sjg-out  
 Instrument maXis impact 282001.00081

**Acquisition Parameter**

|             |            |                      |          |                  |           |
|-------------|------------|----------------------|----------|------------------|-----------|
| Source Type | ESI        | Ion Polarity         | Positive | Set Nebulizer    | 0.3 Bar   |
| Focus       | Not active | Set Capillary        | 3700 V   | Set Dry Heater   | 180 °C    |
| Scan Begin  | 50 m/z     | Set End Plate Offset | -500 V   | Set Dry Gas      | 4.0 l/min |
| Scan End    | 600 m/z    | Set Charging Voltage | 2000 V   | Set Divert Valve | Source    |
|             |            | Set Corona           | 0 nA     | Set APCI Heater  | 0 °C      |

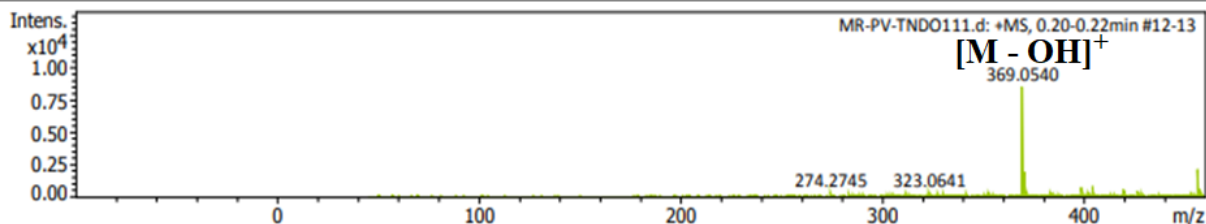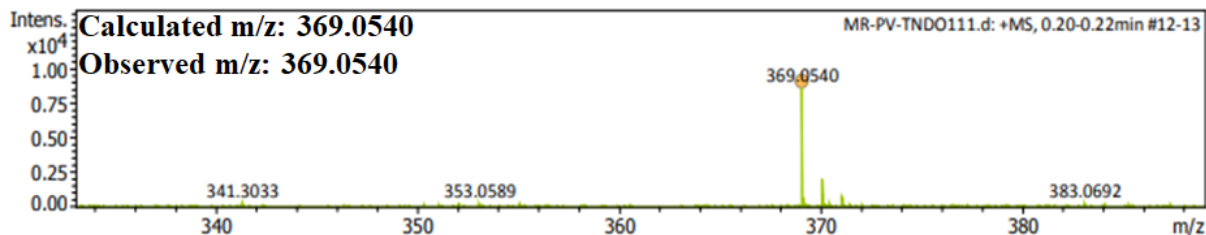

| Meas. m/z | # | Ion Formula | m/z      | err [ppm] | mSigma | # mSigma | Score  | rdb  | e <sup>-</sup> Conf | N-Rule |
|-----------|---|-------------|----------|-----------|--------|----------|--------|------|---------------------|--------|
| 369.0540  | 1 | C18H13N2O5S | 369.0540 | -0.1      | 14.2   | 1        | 100.00 | 16.0 | even                | ok     |

Figure S4. HR mass spectrum of the compound 14d.

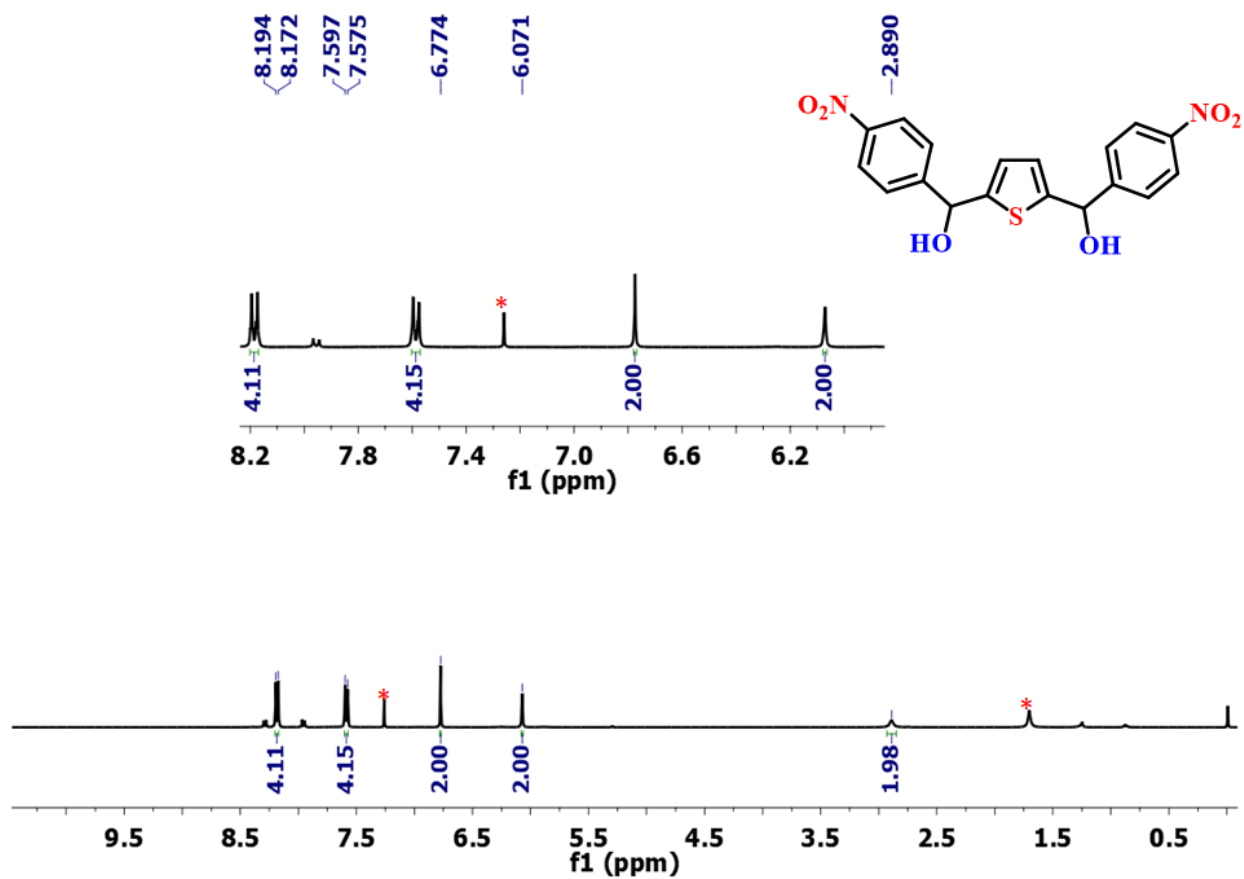

**Figure S5.** <sup>1</sup>H NMR spectrum of the compound **14d** recorded in CDCl<sub>3</sub> on 400 MHz NMR instrument. Note: Peaks marked with asterisk (\*) are due to residual solvents.

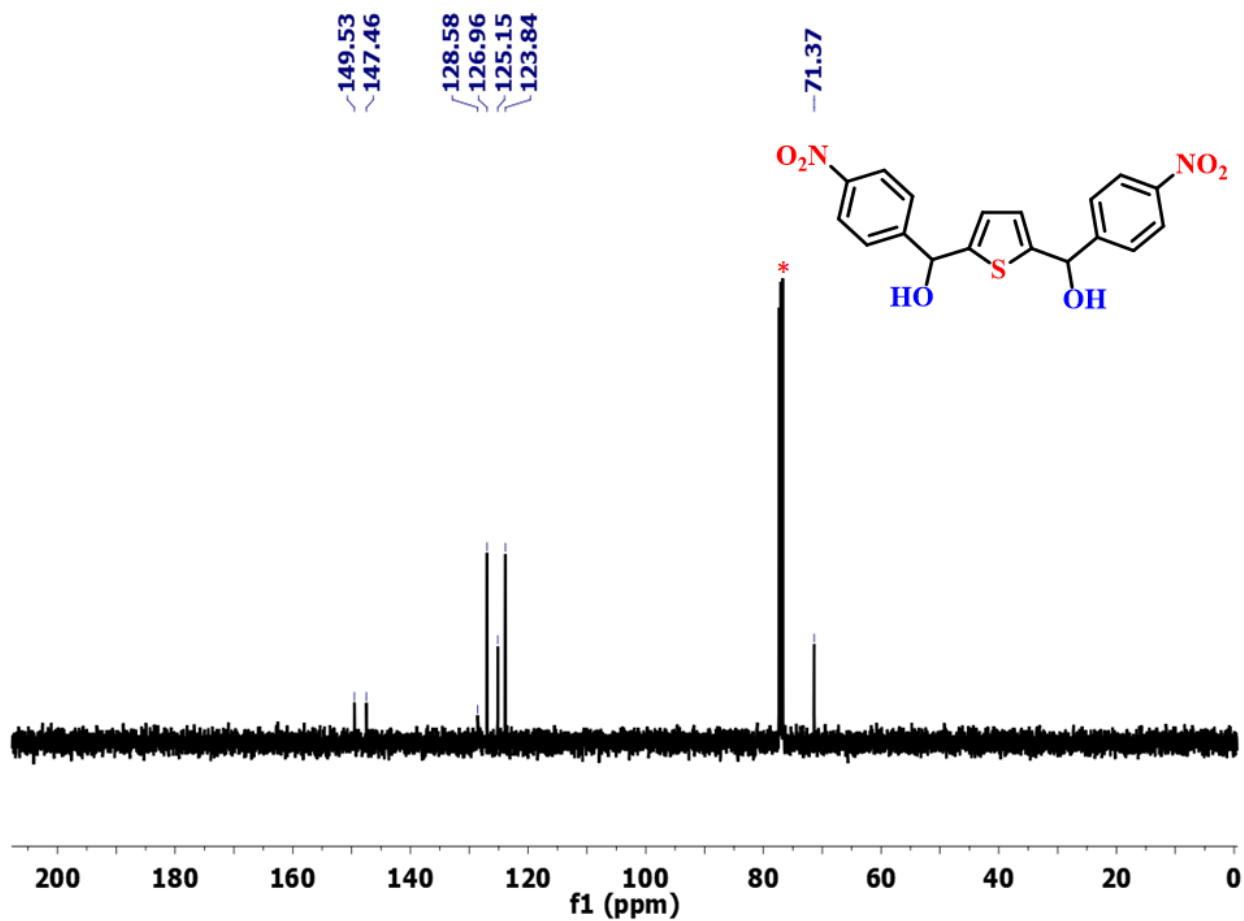

**Figure S6.**  $^{13}\text{C}\{^1\text{H}\}$  NMR spectrum of the compound **14d** recorded in  $\text{CDCl}_3$  on 400 MHz NMR instrument. Note: Peaks marked with asterisk (\*) are due to residual solvents.

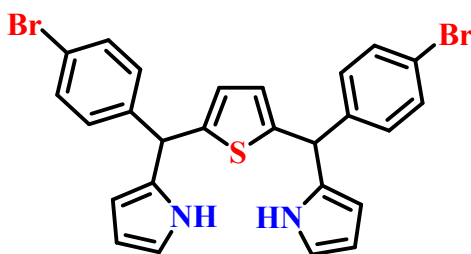

Compound 13b

Department of Chemistry I.I.T. (B)

Agilent | Trusted Answers

## Sample Information

|                |              |                    |                                                                                             |
|----------------|--------------|--------------------|---------------------------------------------------------------------------------------------|
| Name           | MR-PV-BRTPPS | Data File Path     | D:\MassHunter\Data\AUG-22\MR-PV-BRTPPS.d                                                    |
| Sample ID      |              | Acq. Time (Local)  | 16-08-2022 3:22:43 PM (UTC+05:30)                                                           |
| Instrument     | LCMS QTOF    | Method Path (Acq)  | D:\MassHunter\Methods\6545XT_checkout\Methods\TRAINING\MS_SCAN_AC_POS_100-600_4000-100-80.m |
| MS Type        | QTOF         | Version (Acq SW)   | 6200 series TOF/6500 series Q-TOF B.09.00 (B9044.0)                                         |
| Inj. Vol. (ul) | 1            | IRM Status         | Success                                                                                     |
| Position       | P1-E1        | Method Path (DA)   | D:\MassHunter\Report Templates\REPORT_METHOD\HRMS.m                                         |
| Plate Pos.     |              | Target Source Path |                                                                                             |
| Operator       |              | Result Summary     | 1 qualified (1 targets)                                                                     |

## Sample Spectra

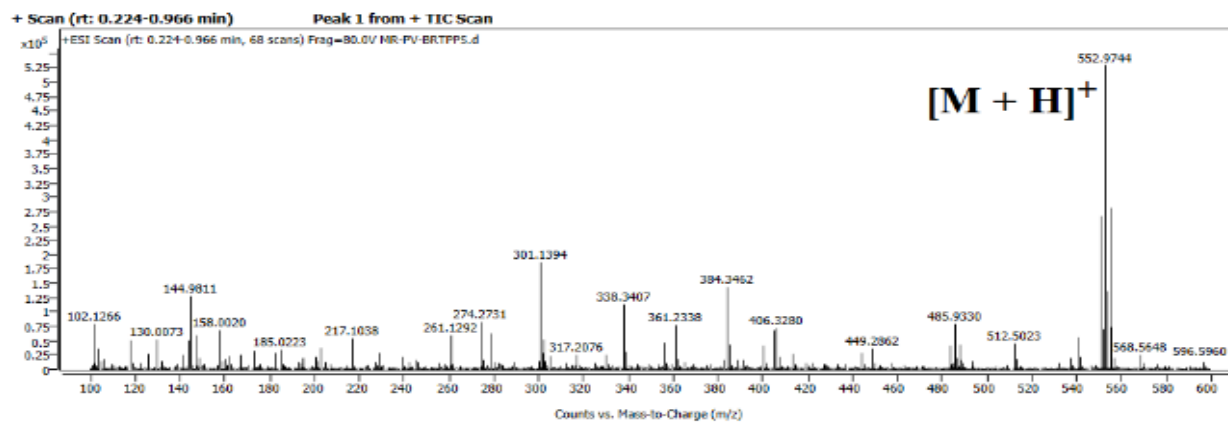

## Compound Details

Cpd. 1: C<sub>26</sub>H<sub>20</sub>Br<sub>2</sub>N<sub>2</sub>S

| Formula                                                          | m/z      | Observed M/Z     | Difference_Da     | Difference_PPM    | Score |
|------------------------------------------------------------------|----------|------------------|-------------------|-------------------|-------|
| C <sub>26</sub> H <sub>20</sub> Br <sub>2</sub> N <sub>2</sub> S | 552.9744 | 552.974408213666 | -1.85788246437824 | -3.37814381011709 | 92.83 |

## Compound Spectra (Zoomed)

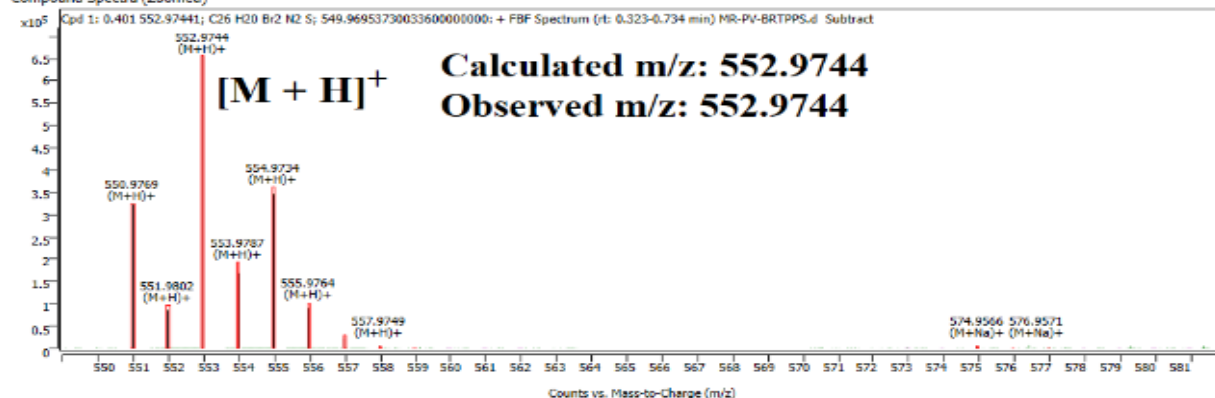

Figure S7. HR mass spectrum of the compound 13b



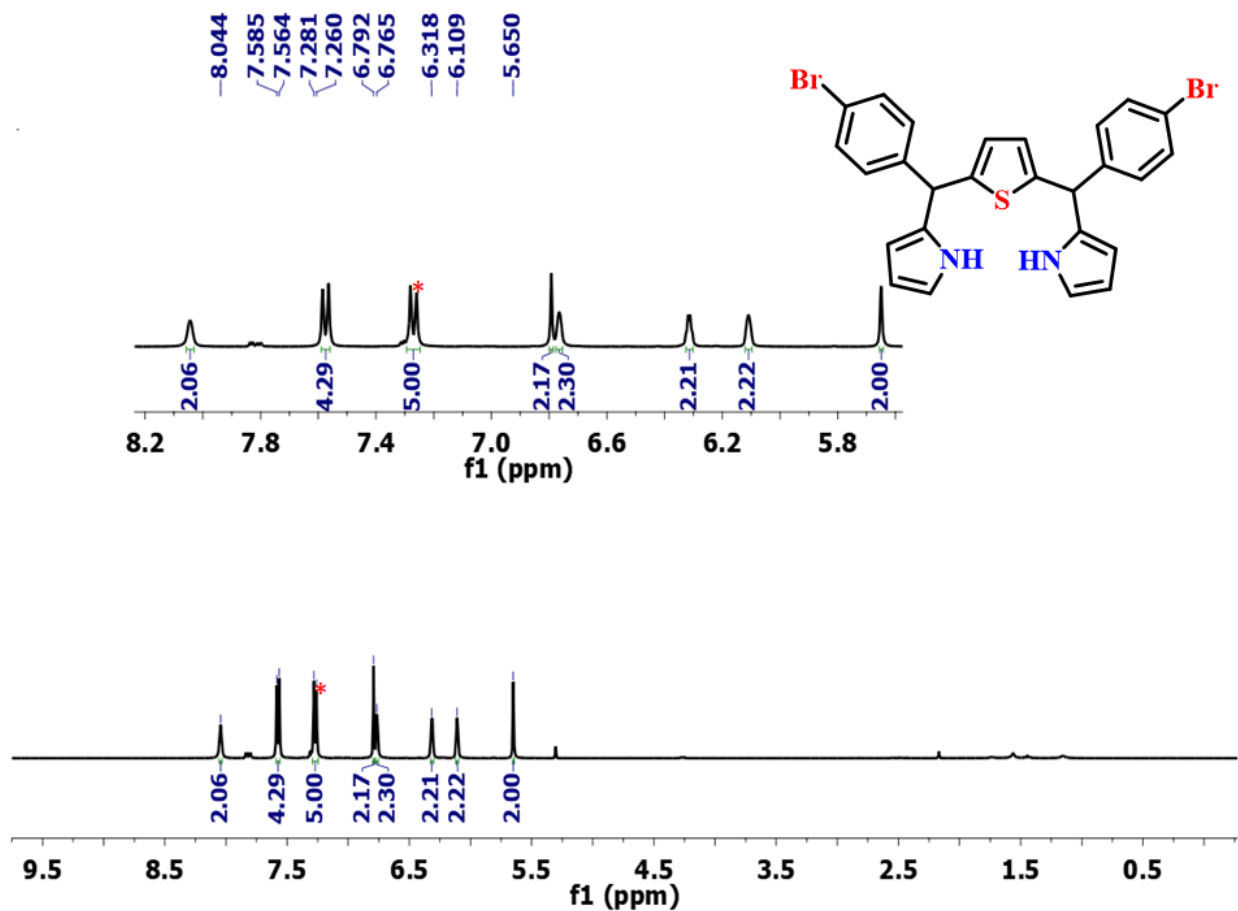

**Figure S8.**  $^1\text{H}$  NMR spectrum of the compound **13b** recorded in  $\text{CDCl}_3$  on 400 MHz NMR instrument. Note: Peaks marked with asterisk (\*) are due to residual solvents.

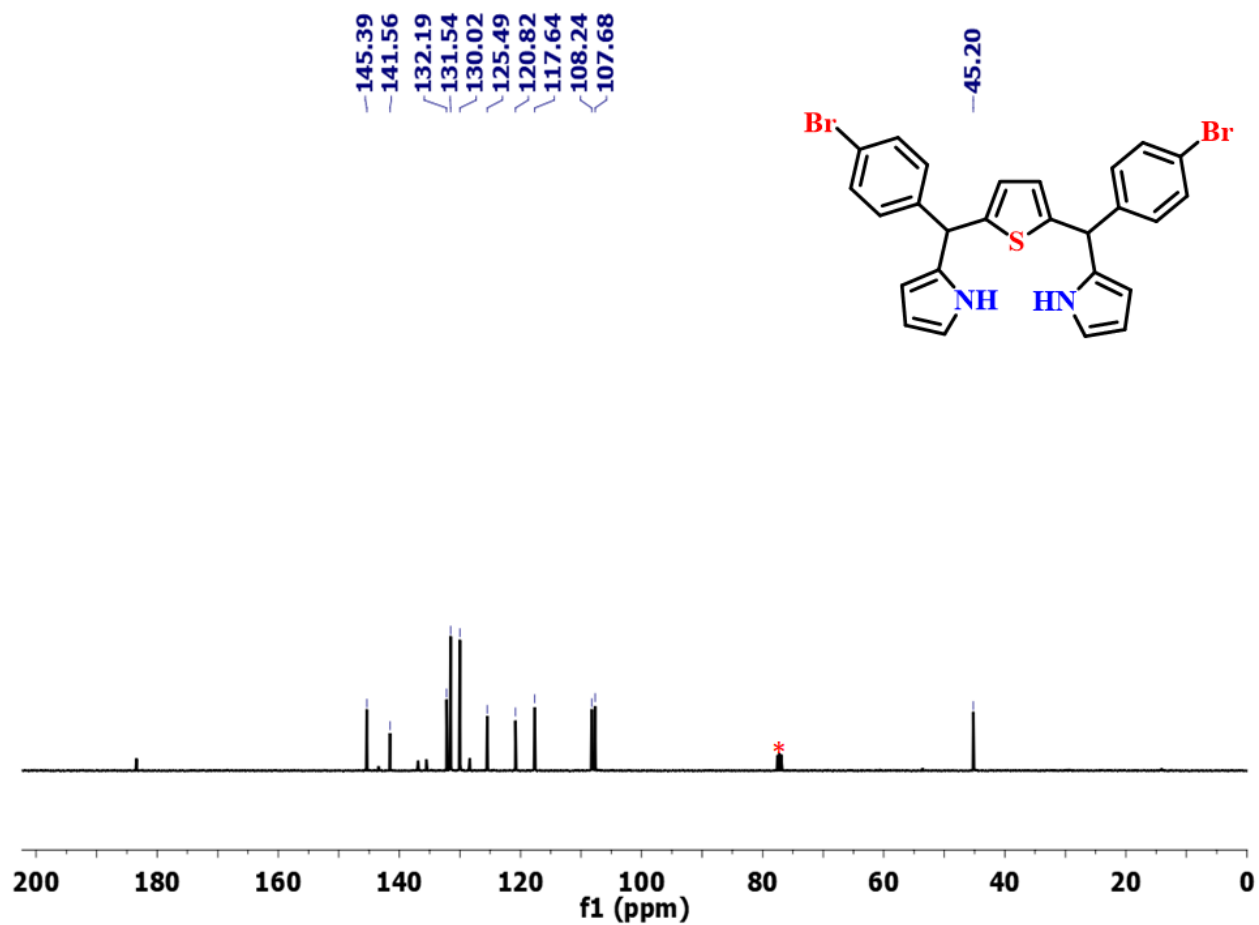

**Figure S9.**  $^{13}\text{C}\{^1\text{H}\}$  NMR spectrum of the compound **13b** recorded in  $\text{CDCl}_3$  on 400 MHz NMR instrument. Note: Peaks marked with asterisk (\*) are due to residual solvents.

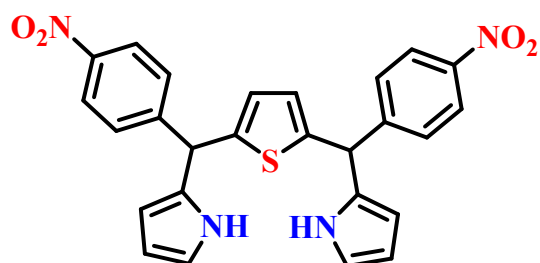

Compound 12d

DEPARTMENT OF CHEMISTRY, I.I.T.(B)

**Analysis Info**

Analysis Name D:\Data\SEP-2022\MR-PV-TNTTP1.d  
 Method Naformat\_pos\_50-600.m  
 Sample Name MR-PV-TNTTP1  
 Comment LRMS

Acquisition Date 9/7/2022 3:24:31 PM

Operator PG RD IN  
 Instrument maXis impact 282001.00081

**Acquisition Parameter**

|             |            |                      |          |                  |           |
|-------------|------------|----------------------|----------|------------------|-----------|
| Source Type | ESI        | Ion Polarity         | Positive | Set Nebulizer    | 0.3 Bar   |
| Focus       | Not active | Set Capillary        | 3700 V   | Set Dry Heater   | 180 °C    |
| Scan Begin  | 50 m/z     | Set End Plate Offset | -500 V   | Set Dry Gas      | 4.0 l/min |
| Scan End    | 600 m/z    | Set Charging Voltage | 2000 V   | Set Divert Valve | Source    |
|             |            | Set Corona           | 0 nA     | Set APCI Heater  | 0 °C      |

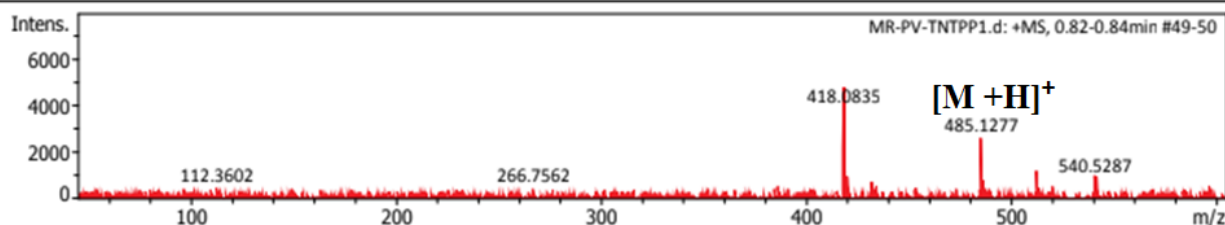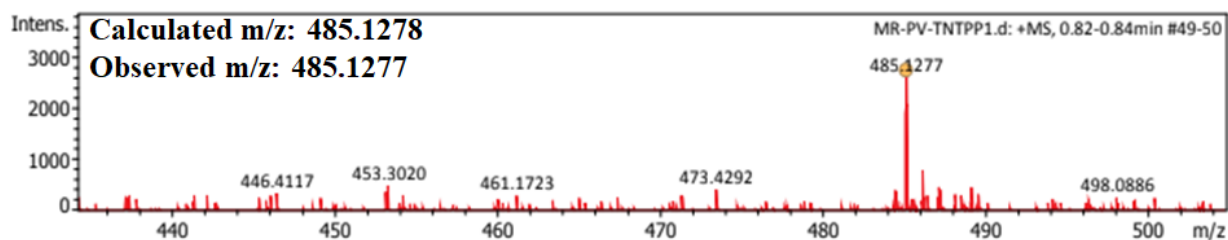

| Meas. m/z | # | Ion Formula                                                     | m/z      | err [ppm] | mSigma | # mSigma | Score  | rdb  | e <sup>-</sup> Conf | N-Rule |
|-----------|---|-----------------------------------------------------------------|----------|-----------|--------|----------|--------|------|---------------------|--------|
| 485.1277  | 1 | C <sub>26</sub> H <sub>21</sub> N <sub>4</sub> O <sub>4</sub> S | 485.1278 | 0.2       | 63.9   | 1        | 100.00 | 21.0 | even                | ok     |

Figure S10. HR mass spectrum of the compound 13d

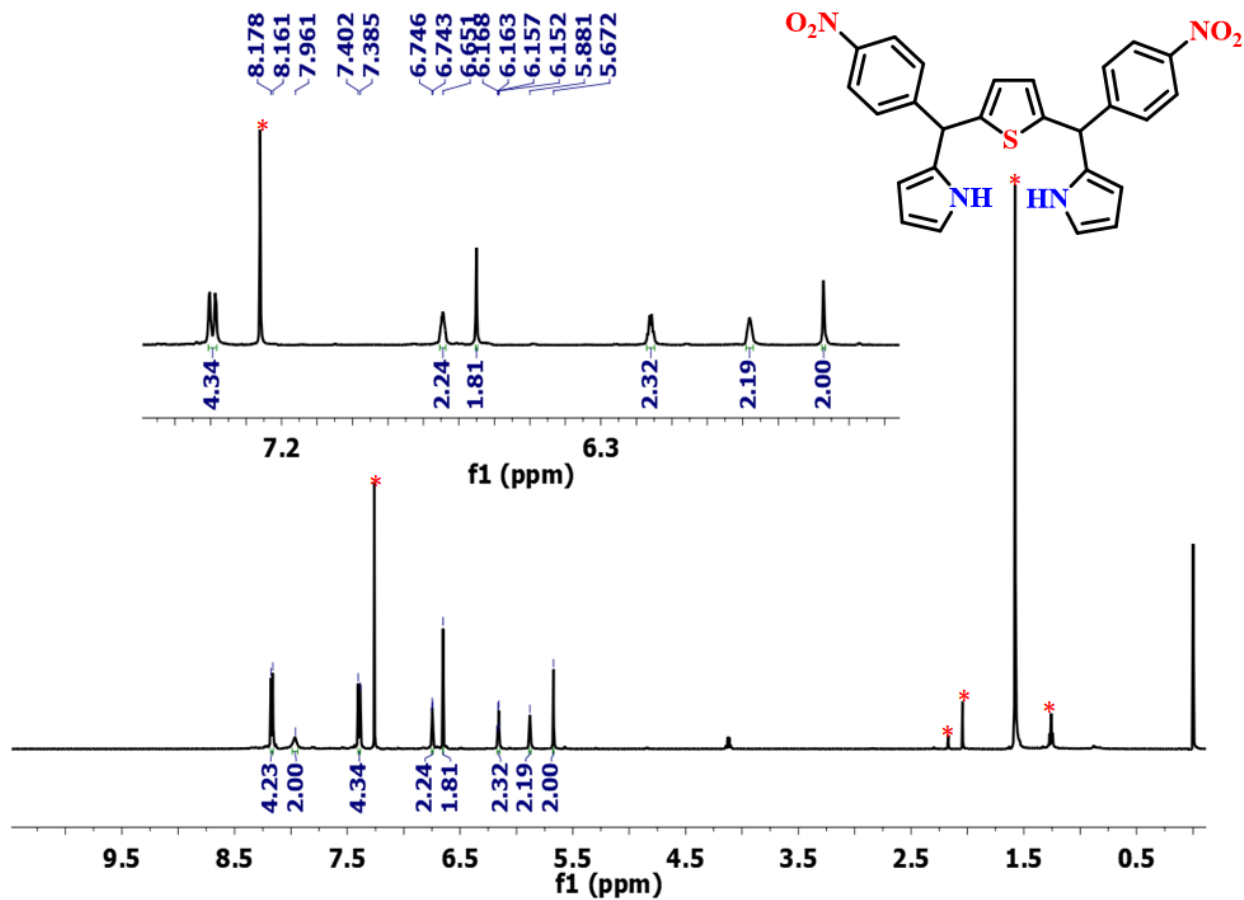

**Figure S11.** <sup>1</sup>H NMR spectrum of the compound **13d** recorded in CDCl<sub>3</sub> on 500 MHz NMR instrument. Note: Peaks marked with asterisk (\*) are due to residual solvents.

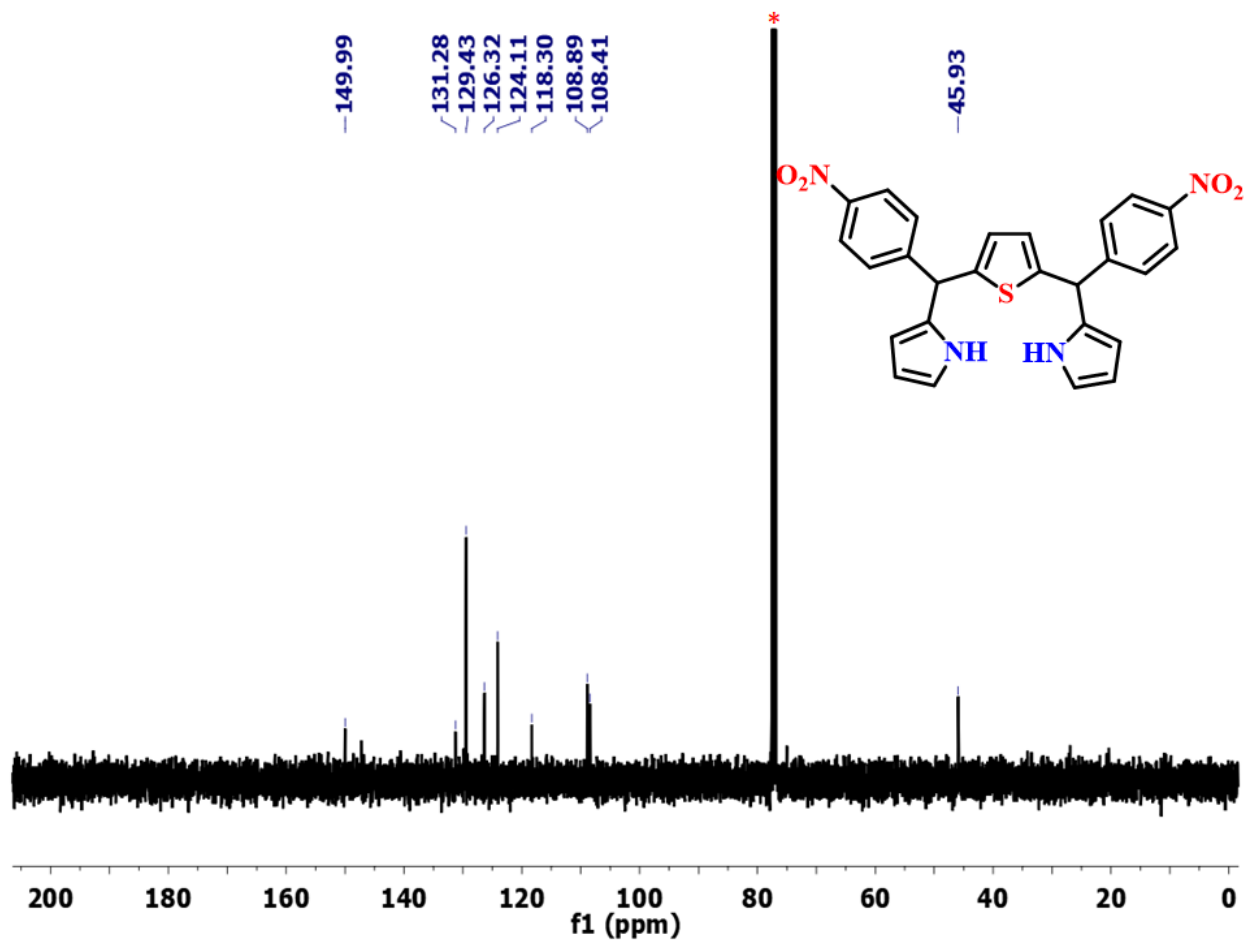

**Figure S12.**  $^{13}\text{C}\{^1\text{H}\}$  NMR spectrum of the compound **13d** recorded in  $\text{CDCl}_3$  on 500 MHz NMR instrument. Note: Peaks marked with asterisk (\*) are due to residual solvents.

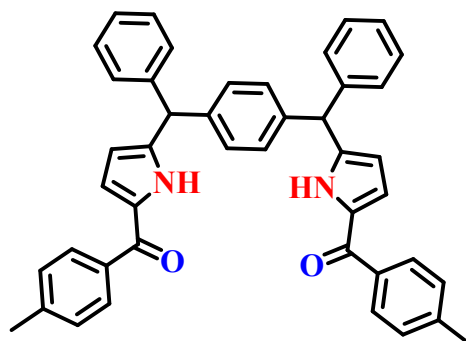

Compound 10

## DEPARTMENT OF CHEMISTRY, I.I.T.(B)

## Analysis Info

Analysis Name D:\Data\AUG-2022\MR-PV-BENZID1.d  
 Method NaICsl\_pos\_1000-a.m  
 Sample Name MR-PV-BENZID1  
 Comment C44H36N2O2

Acquisition Date 8/25/2022 2:48:30 PM

Operator GKL-LS-out  
 Instrument maXis impact 282001.00081

## Acquisition Parameter

|             |            |                      |          |                  |           |
|-------------|------------|----------------------|----------|------------------|-----------|
| Source Type | ESI        | Ion Polarity         | Positive | Set Nebulizer    | 0.3 Bar   |
| Focus       | Not active | Set Capillary        | 3700 V   | Set Dry Heater   | 180 °C    |
| Scan Begin  | 50 m/z     | Set End Plate Offset | -500 V   | Set Dry Gas      | 4.0 l/min |
| Scan End    | 1000 m/z   | Set Charging Voltage | 2000 V   | Set Divert Valve | Source    |
|             |            | Set Corona           | 0 nA     | Set APCI Heater  | 0 °C      |

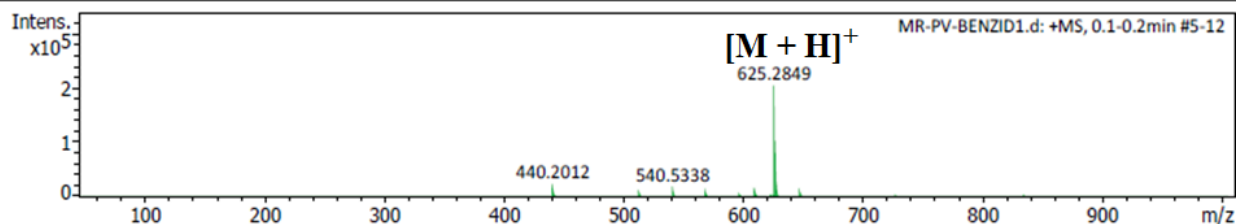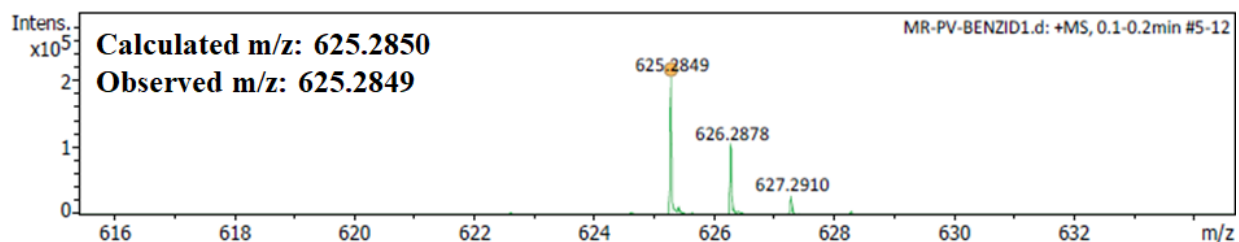

| Meas. m/z | # | Ion Formula | m/z      | err [ppm] | mSigma | # mSigma | Score  | rdb  | e <sup>-</sup> Conf | N-Rule |
|-----------|---|-------------|----------|-----------|--------|----------|--------|------|---------------------|--------|
| 625.2849  | 1 | C44H37N2O2  | 625.2850 | 0.0       | 8.2    | 1        | 100.00 | 28.0 | even                | ok     |

Figure S13. HR mass spectrum of the compound 10.

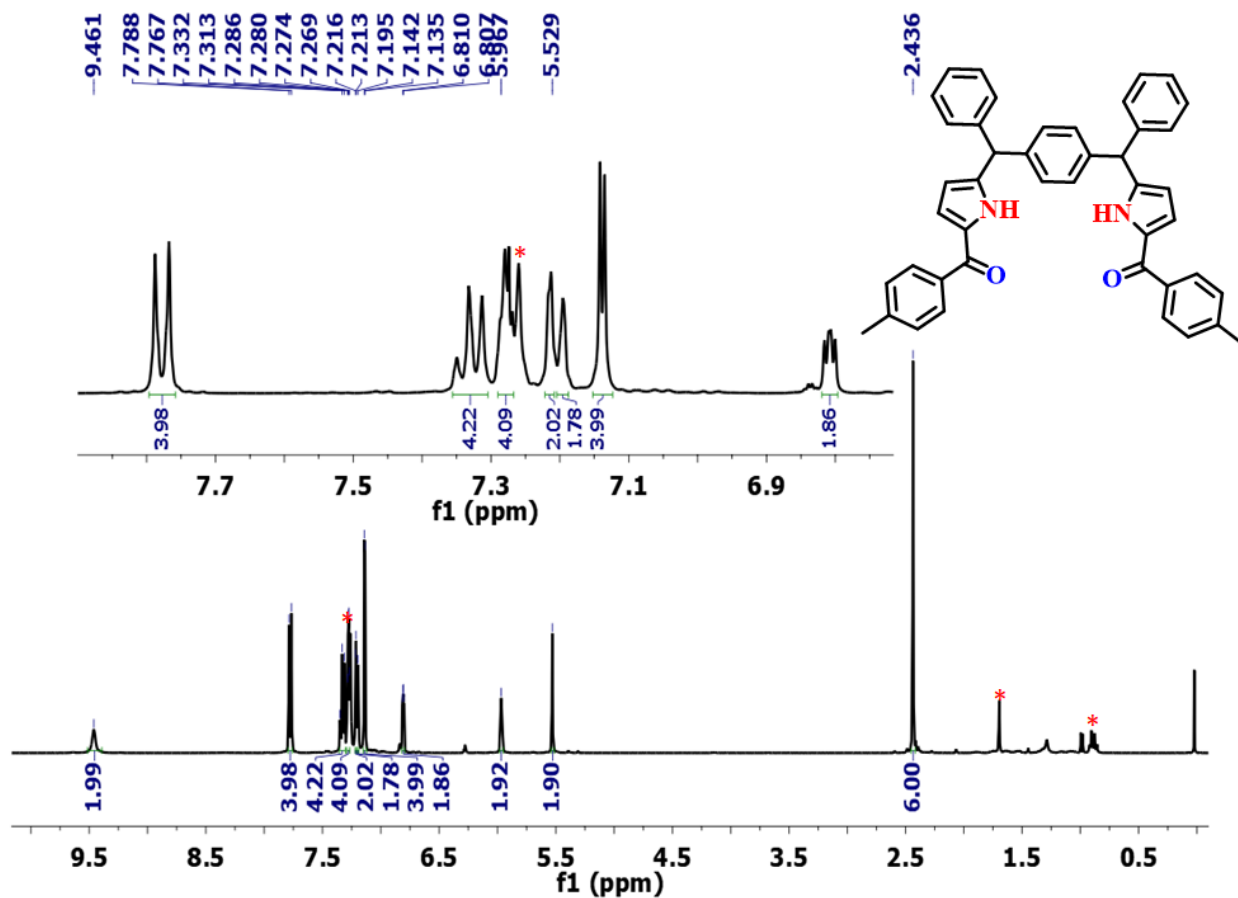

**Figure S14.**  $^1\text{H}$  NMR spectrum of the compound **10** recorded in  $\text{CDCl}_3$  on 400 MHz NMR instrument. Note: Peaks marked with asterisk (\*) are due to residual solvents.

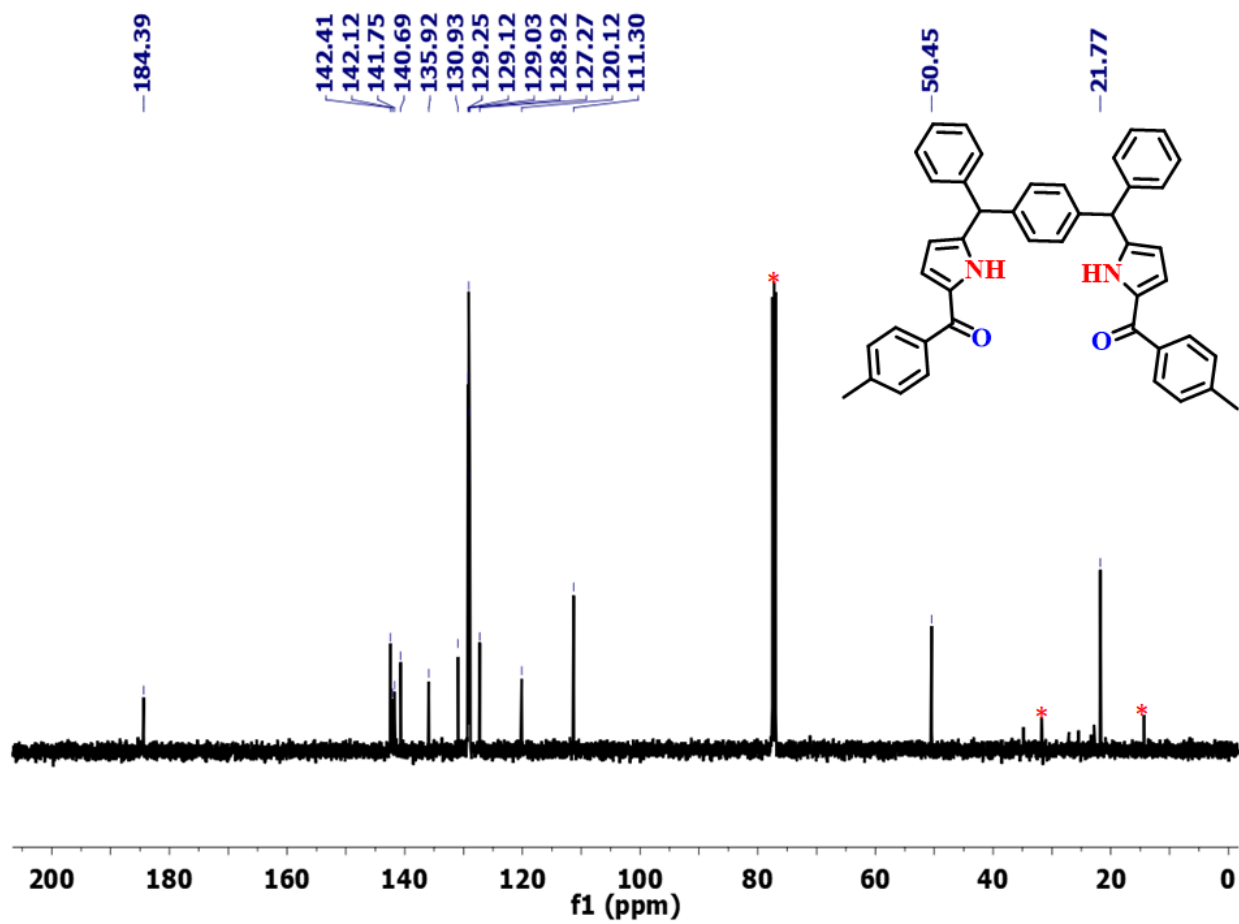

**Figure S15.**  $^{13}\text{C}\{^1\text{H}\}$  NMR spectrum of the compound **10** recorded in  $\text{CDCl}_3$  on 400 MHz NMR instrument. Note: Peaks marked with asterisk (\*) are due to residual solvents.



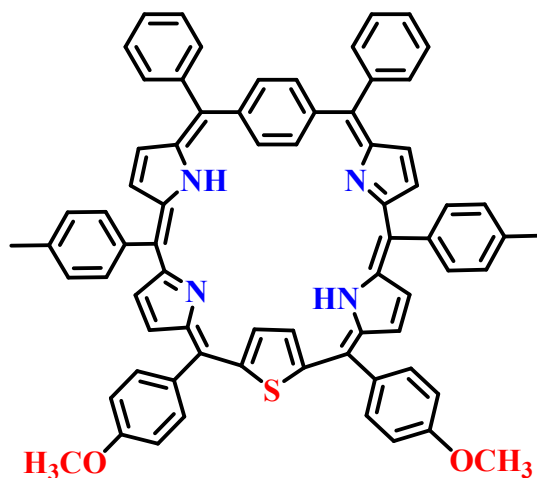

Compound 5

DEPARTMENT OF CHEMISTRY, I.I.T.(B)

**Analysis Info**

Analysis Name D:\Data\DEC-2021\MR-POOJA-BLUE.d  
 Method NaICSI\_pos\_1500a.m  
 Sample Name MR-POOJA-BLUE  
 Comment C72H56N4SO2

Acquisition Date 12/23/2021 6:30:33 PM

Operator ppi OUT  
 Instrument maXis impact 282001.00081

**Acquisition Parameter**

|             |            |                      |          |                  |           |
|-------------|------------|----------------------|----------|------------------|-----------|
| Source Type | ESI        | Ion Polarity         | Positive | Set Nebulizer    | 0.3 Bar   |
| Focus       | Not active | Set Capillary        | 3700 V   | Set Dry Heater   | 180 °C    |
| Scan Begin  | 50 m/z     | Set End Plate Offset | -500 V   | Set Dry Gas      | 4.5 l/min |
| Scan End    | 1500 m/z   | Set Charging Voltage | 2000 V   | Set Divert Valve | Source    |
|             |            | Set Corona           | 0 nA     | Set APCI Heater  | 0 °C      |

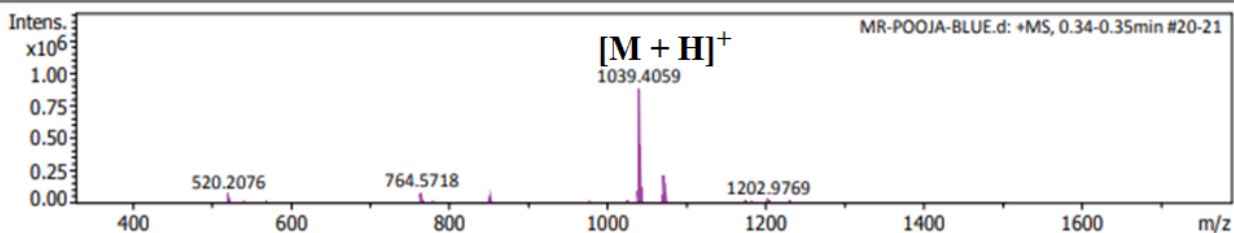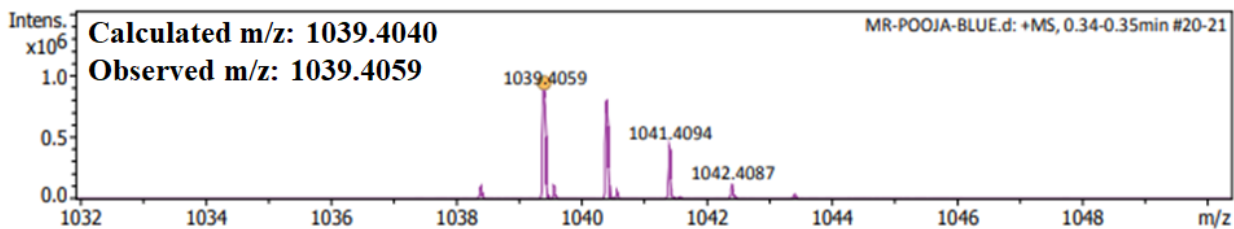

| Meas. m/z | # | Ion Formula | m/z       | err [ppm] | mSigma | # mSigma | Score  | rdb  | e <sup>-</sup> Conf | N-Rule |
|-----------|---|-------------|-----------|-----------|--------|----------|--------|------|---------------------|--------|
| 1039.4059 | 1 | C72H55N4O2S | 1039.4040 | -1.8      | 72.9   | 1        | 100.00 | 50.0 | even                | ok     |

Figure S16. HR mass spectrum of the compound 5

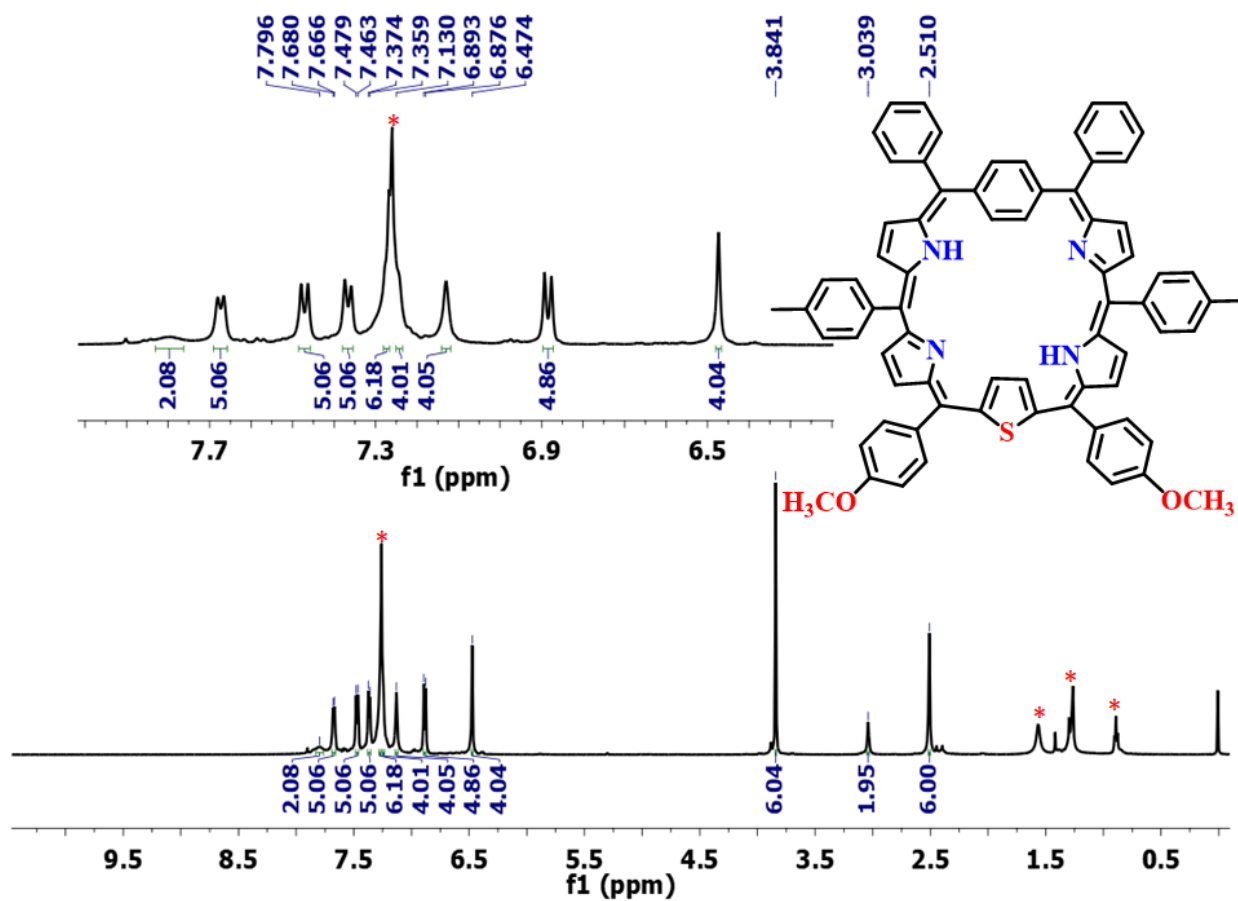

**Figure S17.**  $^1\text{H}$  NMR spectrum of the compound **5** recorded in  $\text{CDCl}_3$  at 298 K on 500 MHz NMR instrument. Note: Peaks marked with asterisk (\*) are due to residual solvents.

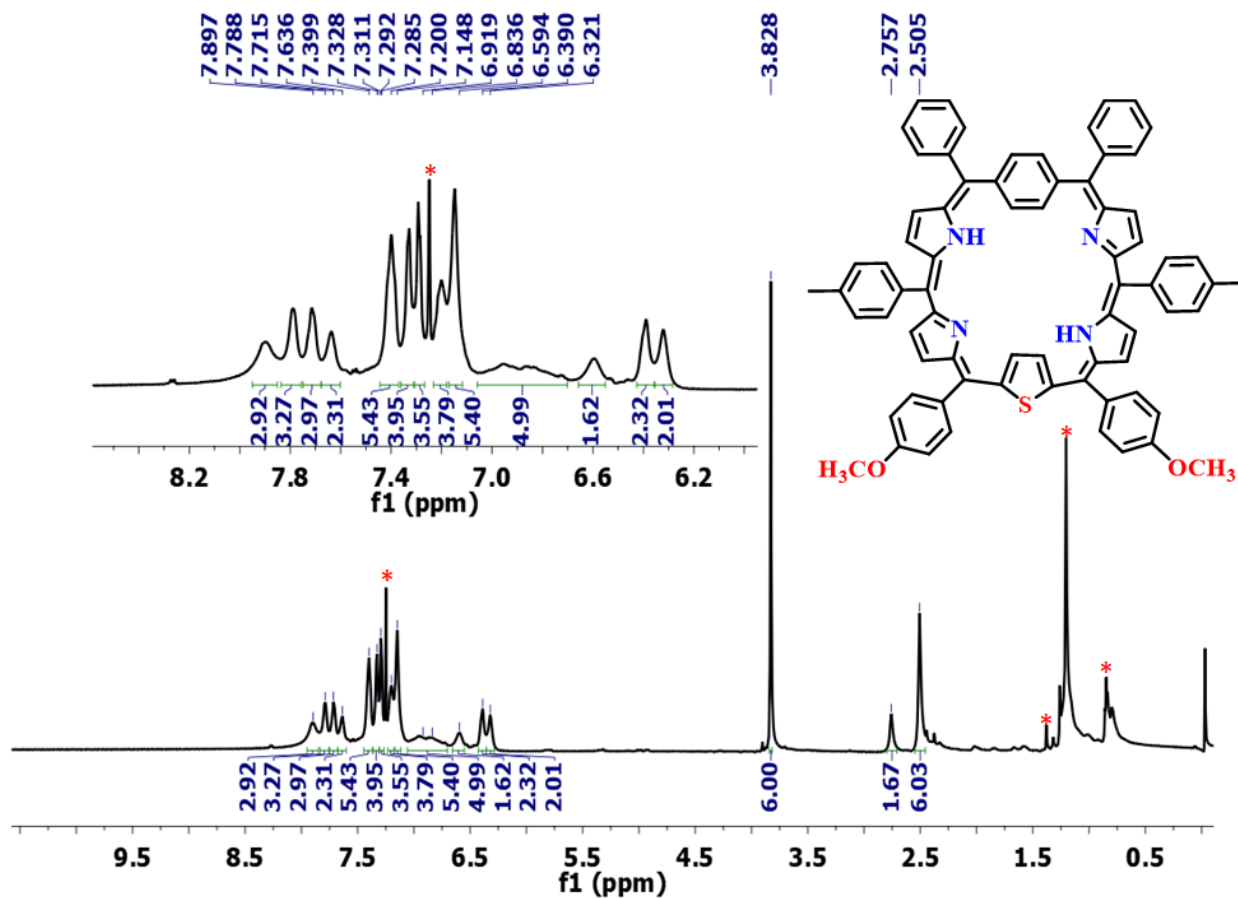

**Figure S18.**  $^1\text{H}$  NMR spectrum of the compound **5** recorded in  $\text{CDCl}_3$  at 223 K on 600 MHz NMR instrument. Note: Peaks marked with asterisk (\*) are due to residual solvents.

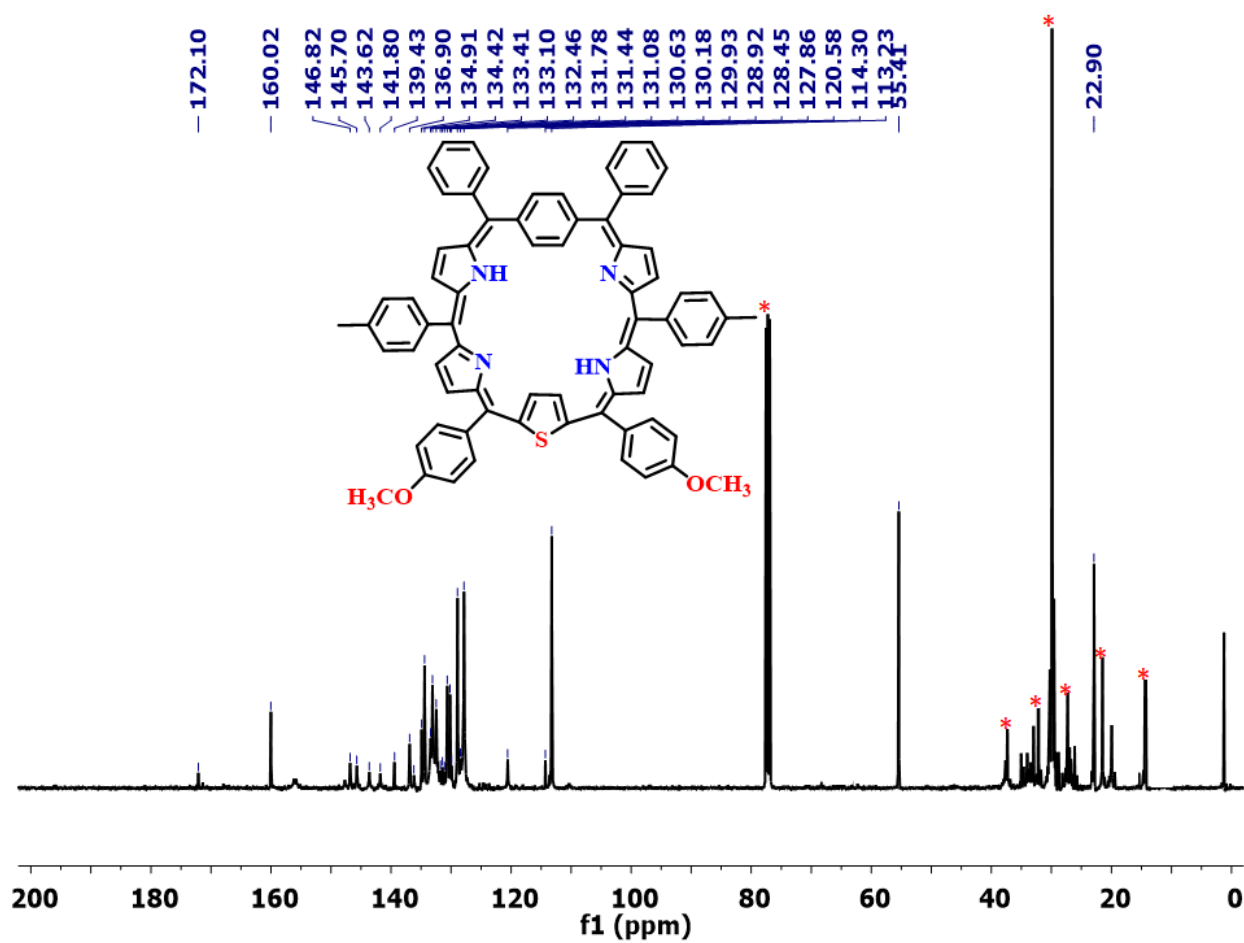

**Figure S19.**  $^{13}\text{C}\{^1\text{H}\}$  NMR spectrum of the compound **5** recorded in  $\text{CDCl}_3$  on 400 MHz NMR instrument. Note: Peaks marked with asterisk (\*) are due to residual solvents.

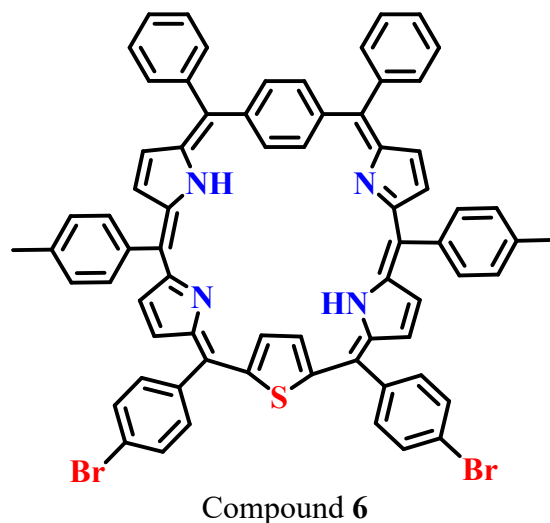

DEPARTMENT OF CHEMISTRY, I.I.T.(B)

#### Analysis Info

Analysis Name D:\Data\APR-2022\MR-POOJA-BROMOMAC.d  
 Method NaICSI\_pos\_1500a.m  
 Sample Name MR-POOJA-BROMOMAC  
 Comment C70H48Br2N4S

Acquisition Date 4/29/2022 11:04:57 AM

Operator MR-IN  
 Instrument maXis impact 282001.00081

#### Acquisition Parameter

|             |            |                      |          |                  |           |
|-------------|------------|----------------------|----------|------------------|-----------|
| Source Type | ESI        | Ion Polarity         | Positive | Set Nebulizer    | 0.3 Bar   |
| Focus       | Not active | Set Capillary        | 3700 V   | Set Dry Heater   | 180 °C    |
| Scan Begin  | 50 m/z     | Set End Plate Offset | -500 V   | Set Dry Gas      | 4.5 l/min |
| Scan End    | 1500 m/z   | Set Charging Voltage | 2000 V   | Set Divert Valve | Source    |
|             |            | Set Corona           | 0 nA     | Set APCI Heater  | 0 °C      |

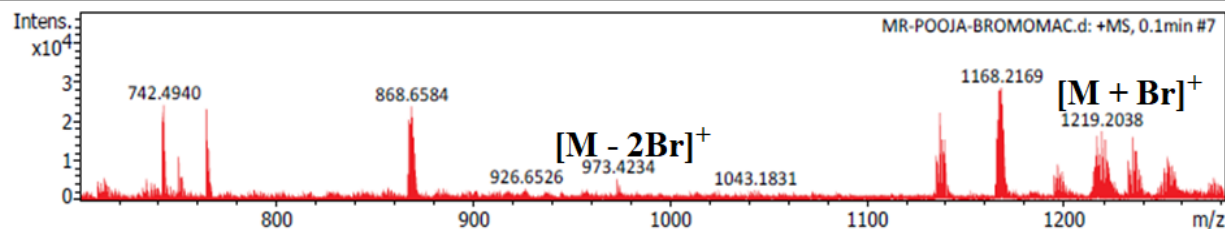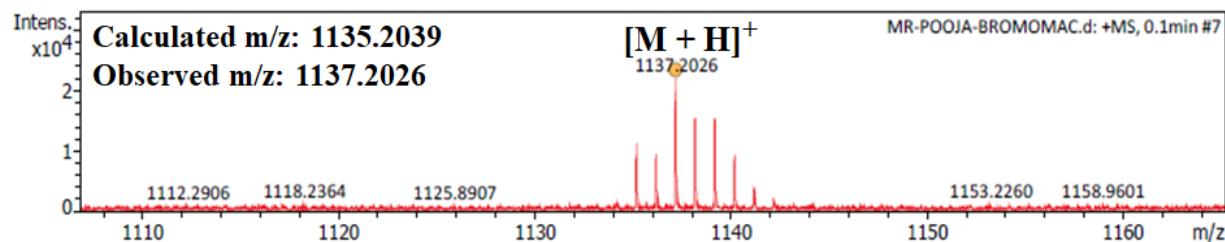

| Meas. m/z | # | Ion Formula  | m/z       | err [ppm] | mSigma | # mSigma | Score  | rdb  | e <sup>-</sup> Conf | N-Rule |
|-----------|---|--------------|-----------|-----------|--------|----------|--------|------|---------------------|--------|
| 1137.2026 | 1 | C70H49Br2N4S | 1135.2039 | 0.3       | 37.0   | 1        | 100.00 | 54.0 | even                | ok     |

Figure S20. HR mass spectrum of the compound 6

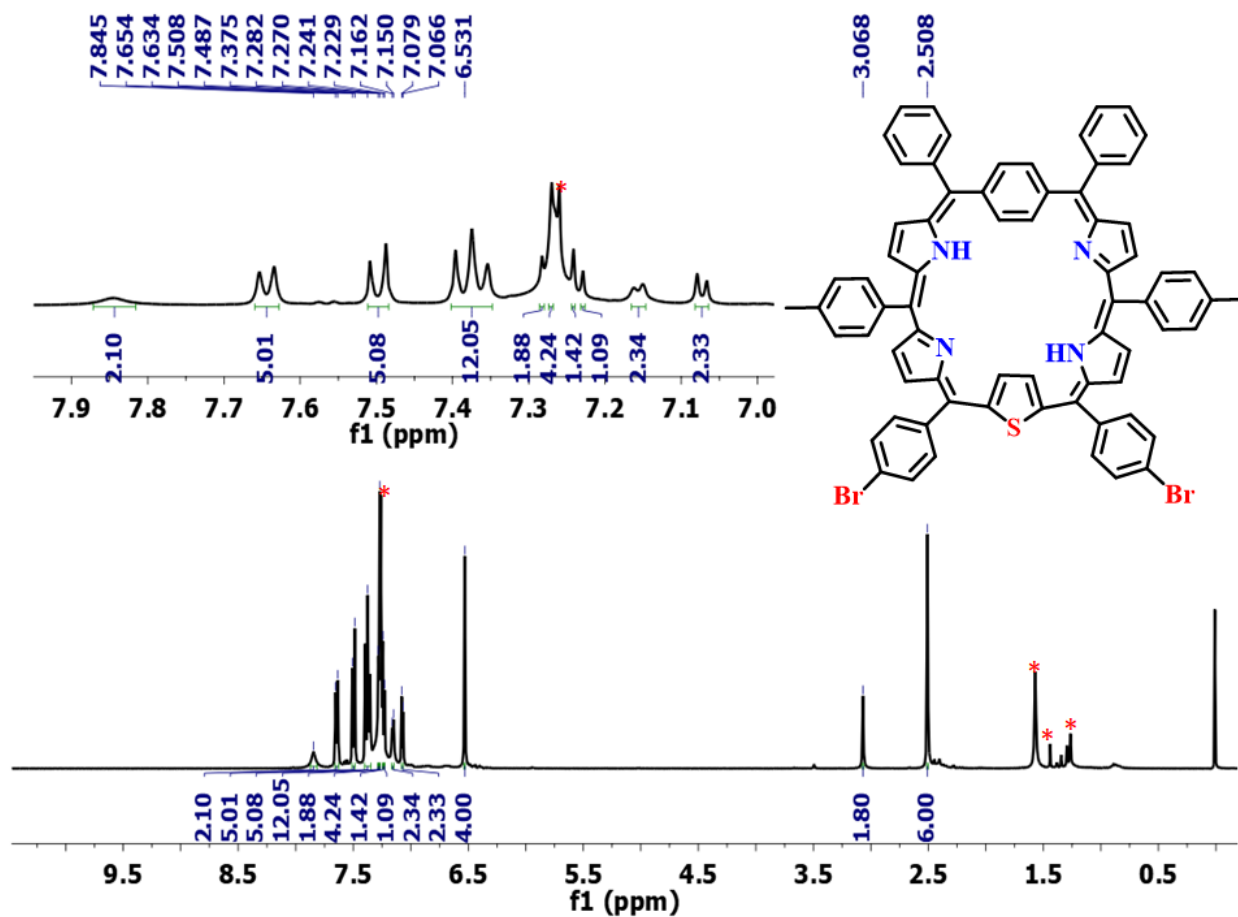

**Figure S21.**  $^1\text{H}$  NMR spectrum of the compound **6** recorded in  $\text{CDCl}_3$  on 400 MHz NMR instrument. Note: Peaks marked with asterisk (\*) are due to residual solvents.

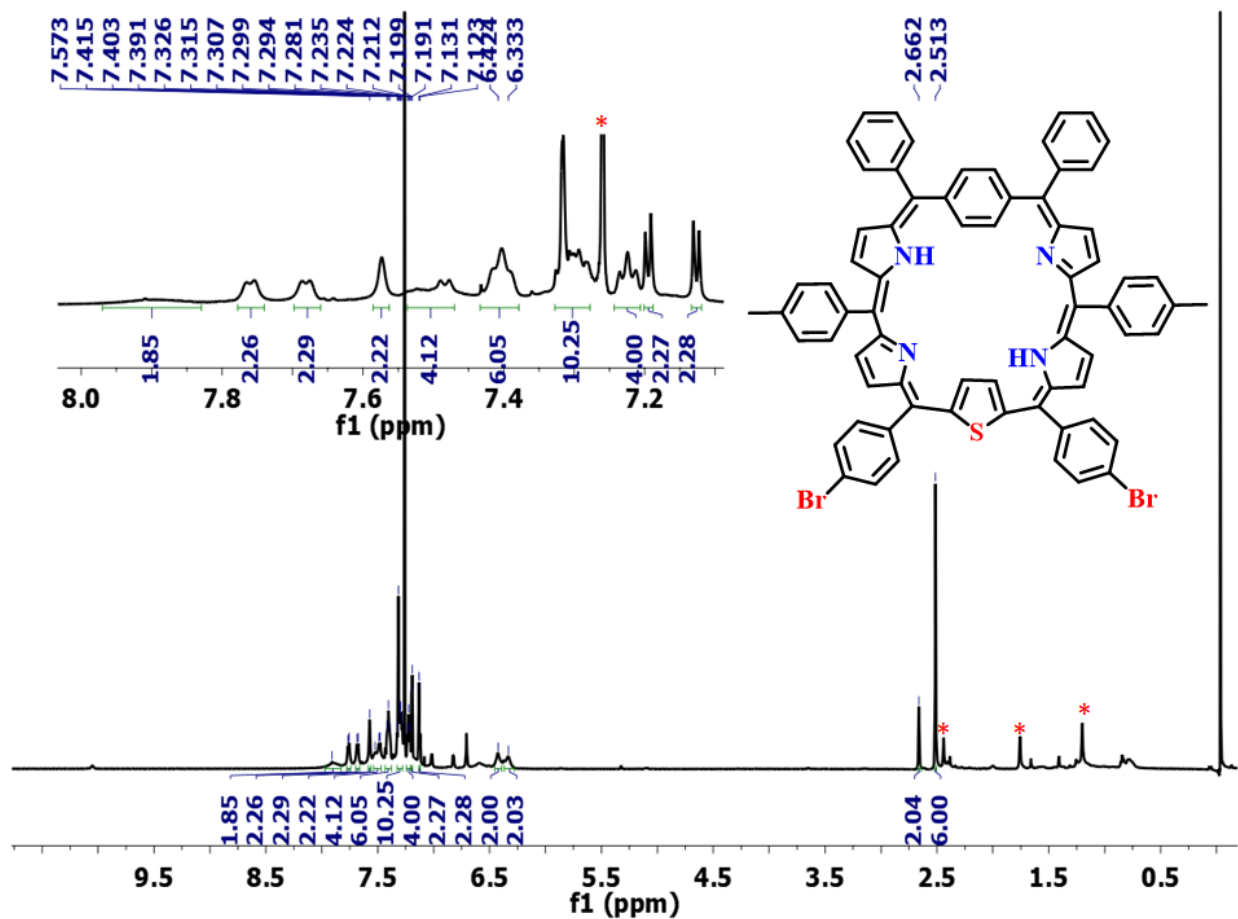

**Figure S22.**  $^1\text{H}$  NMR spectrum of the compound **6** recorded in  $\text{CDCl}_3$  at 223 K on 600 MHz NMR instrument. Note: Peaks marked with asterisk (\*) are due to residual solvents.

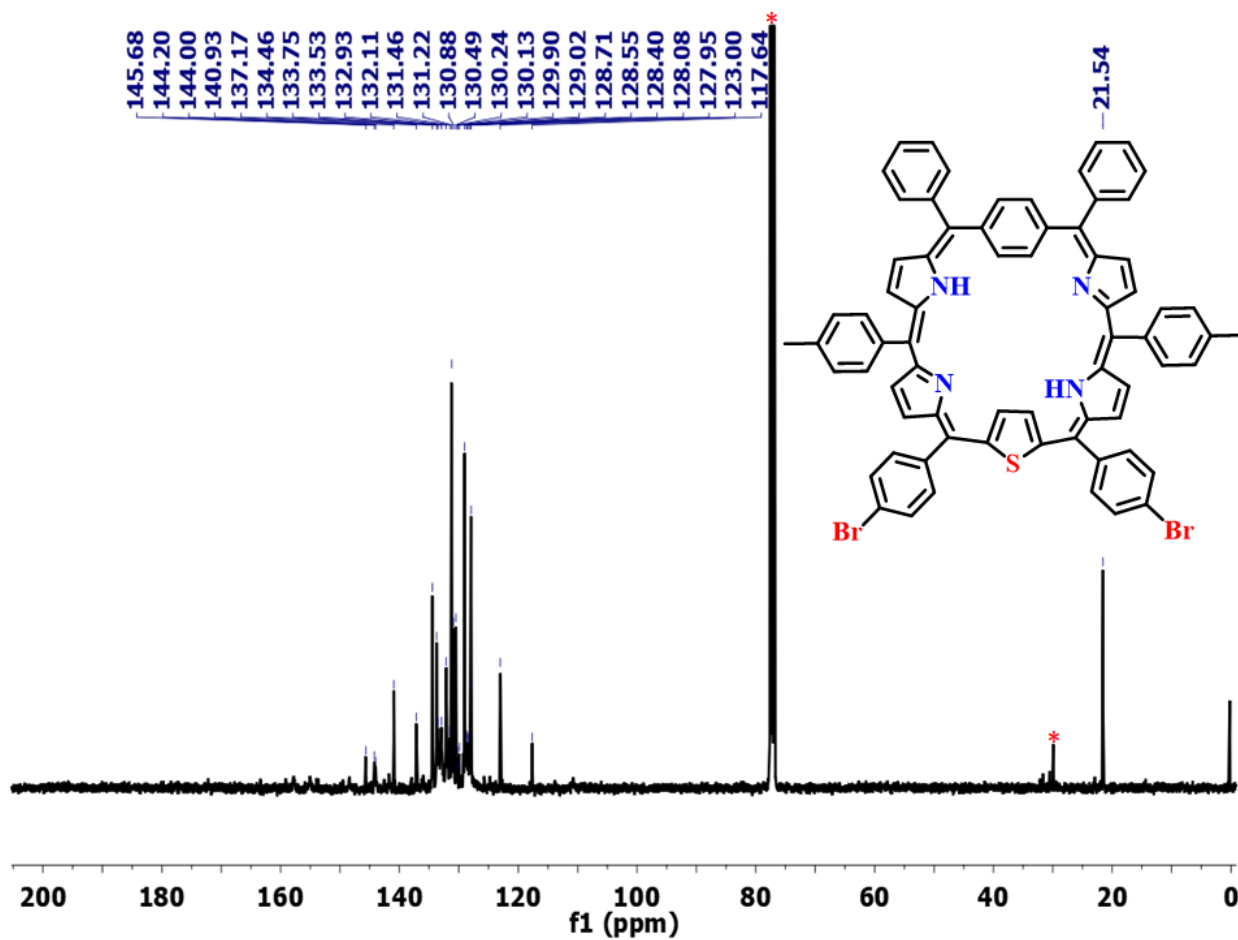

**Figure S23.**  $^{13}\text{C}\{^1\text{H}\}$  NMR spectrum of the compound **6** recorded in  $\text{CDCl}_3$  on 400 MHz NMR instrument. Note: Peaks marked with asterisk (\*) are due to residual solvents.



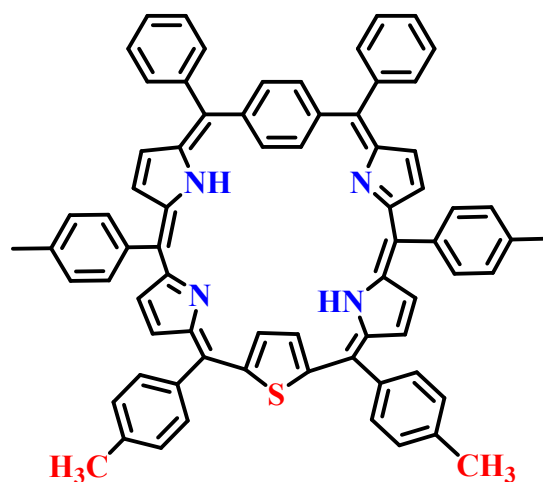

Compound 7

DEPARTMENT OF CHEMISTRY, I.I.T.(B)

**Analysis Info**

Analysis Name D:\Data\MAR-2022\MR-POOJA-BMAC4.d  
 Method NaICsl\_pos\_1500.m  
 Sample Name MR-POOJA-BMAC2  
 Comment C72H54N4S

Acquisition Date 3/17/2022 4:50:24 PM

Operator mr in  
 Instrument maXis impact 282001.00081

**Acquisition Parameter**

|             |            |                      |          |                  |           |
|-------------|------------|----------------------|----------|------------------|-----------|
| Source Type | ESI        | Ion Polarity         | Positive | Set Nebulizer    | 0.3 Bar   |
| Focus       | Not active | Set Capillary        | 3700 V   | Set Dry Heater   | 180 °C    |
| Scan Begin  | 50 m/z     | Set End Plate Offset | -500 V   | Set Dry Gas      | 4.0 l/min |
| Scan End    | 1500 m/z   | Set Charging Voltage | 2000 V   | Set Divert Valve | Source    |
|             |            | Set Corona           | 0 nA     | Set APCI Heater  | 0 °C      |

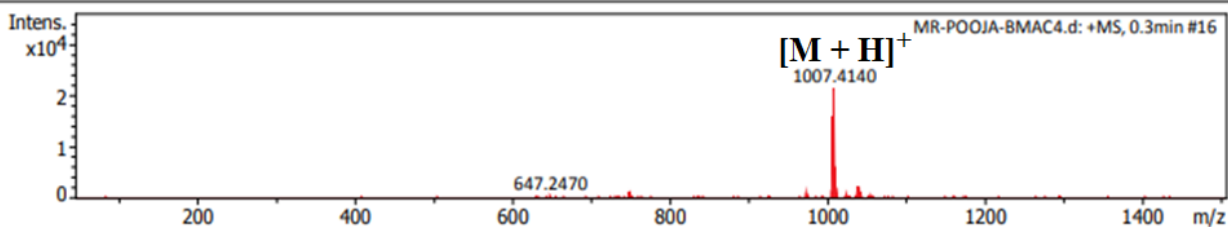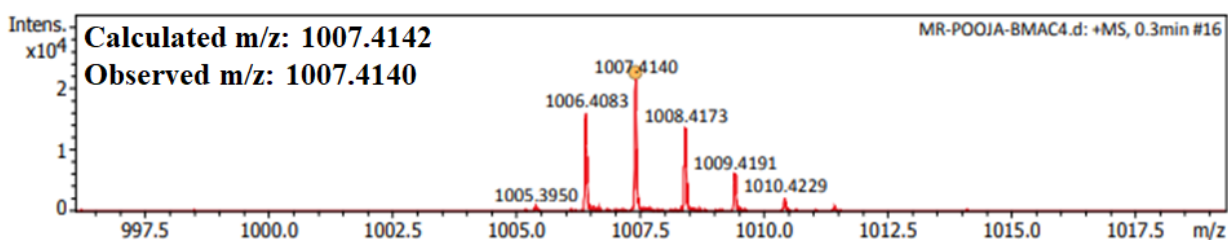

| Meas. m/z | # | Ion Formula | m/z       | err [ppm] | mSigma | # mSigma | Score  | rdb  | e <sup>-</sup> Conf | N-Rule |
|-----------|---|-------------|-----------|-----------|--------|----------|--------|------|---------------------|--------|
| 1007.4140 | 1 | C72H55N4S   | 1007.4142 | 0.2       | 89.3   | 1        | 100.00 | 50.0 | even                | ok     |

Figure S24. HR mass spectrum of the compound 7

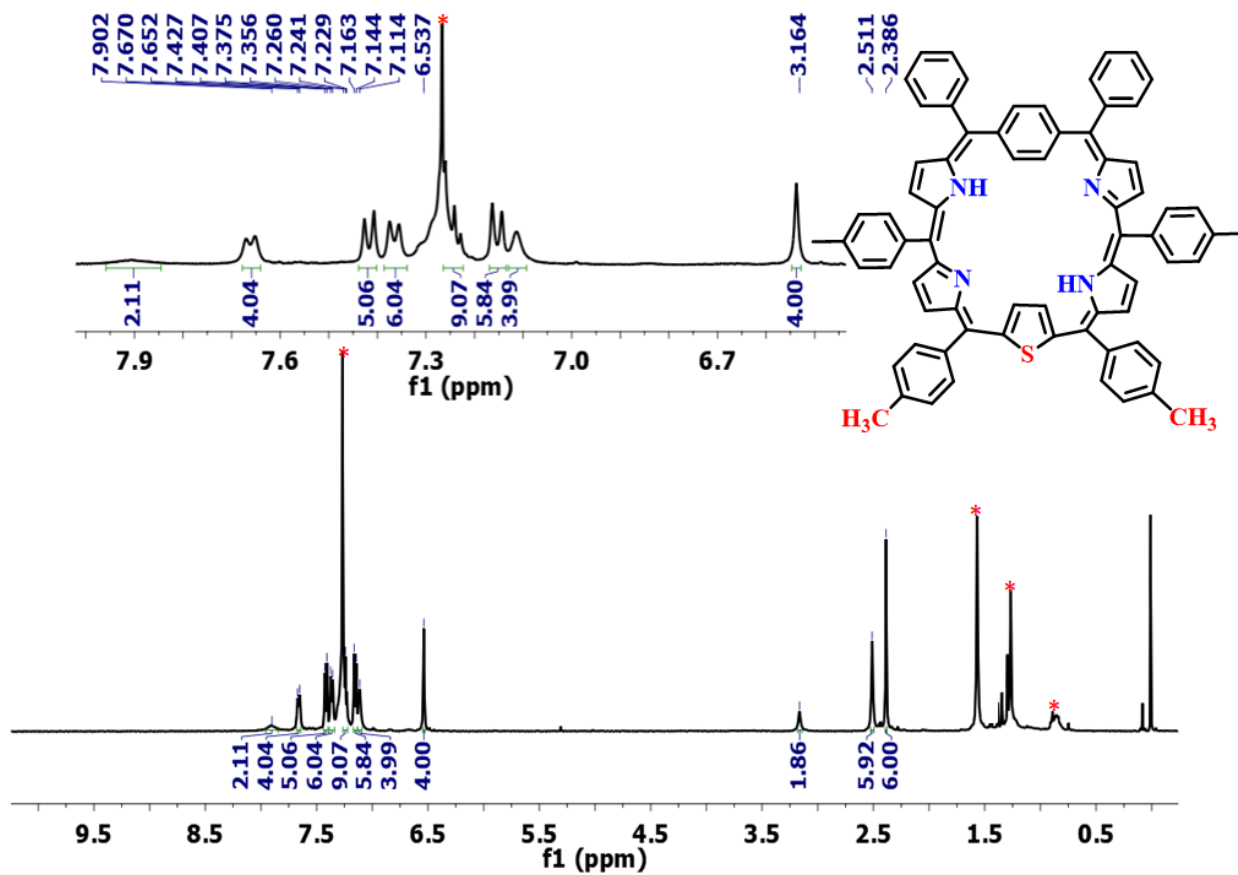

**Figure S25.**  $^1\text{H}$  NMR spectrum of the compound 7 recorded in  $\text{CDCl}_3$  on 400 MHz NMR instrument. Note: Peaks marked with asterisk (\*) are due to residual solvents.

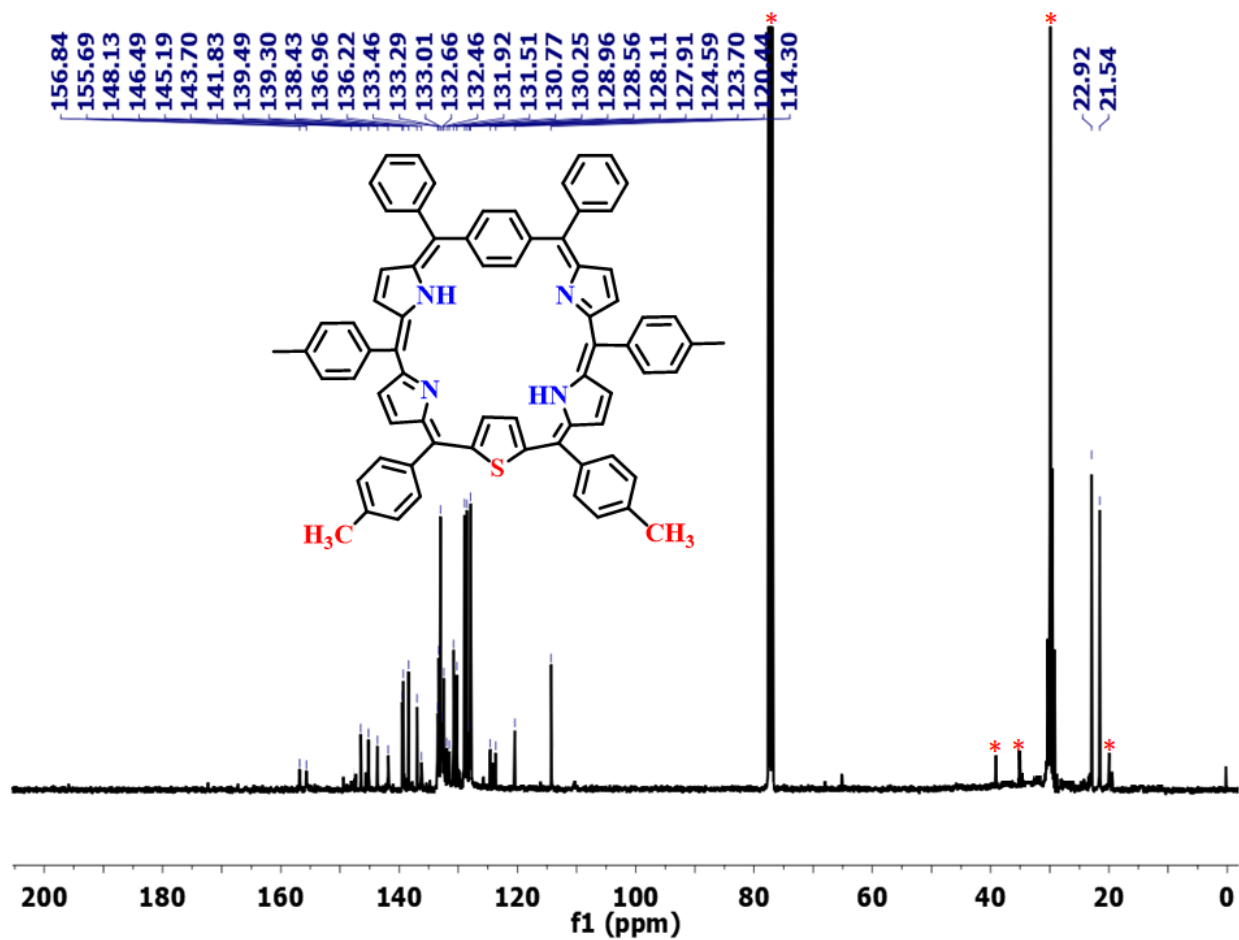

**Figure S26.**  $^{13}\text{C}\{^1\text{H}\}$  NMR spectrum of the compound 7 recorded in  $\text{CDCl}_3$  on 400 MHz NMR instrument. Note: Peaks marked with asterisk (\*) are due to residual solvents.

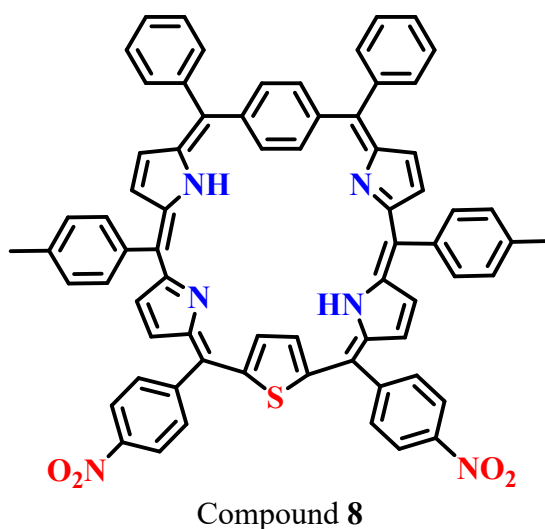

DEPARTMENT OF CHEMISTRY, I.I.T.(B)

#### Analysis Info

Analysis Name D:\Data\APR-2022\MR-POOJA-NITRO-MAC2.d  
 Method NaICsl\_pos\_1500a.m  
 Sample Name MR-POOJA-NITRO-MAC  
 Comment C70H48N6O4S

Acquisition Date 4/26/2022 2:54:29 PM

Operator MR-IN  
 Instrument maXis impact 282001.00081

#### Acquisition Parameter

|             |            |                      |          |                  |           |
|-------------|------------|----------------------|----------|------------------|-----------|
| Source Type | ESI        | Ion Polarity         | Positive | Set Nebulizer    | 0.3 Bar   |
| Focus       | Not active | Set Capillary        | 3700 V   | Set Dry Heater   | 180 °C    |
| Scan Begin  | 50 m/z     | Set End Plate Offset | -500 V   | Set Dry Gas      | 4.5 l/min |
| Scan End    | 1500 m/z   | Set Charging Voltage | 2000 V   | Set Divert Valve | Source    |
|             |            | Set Corona           | 0 nA     | Set APCI Heater  | 0 °C      |

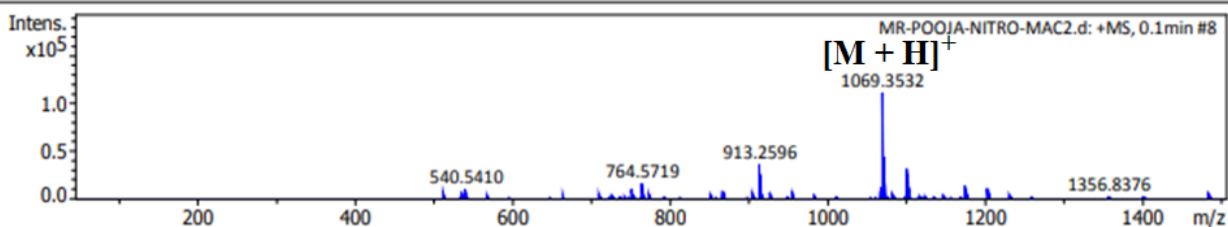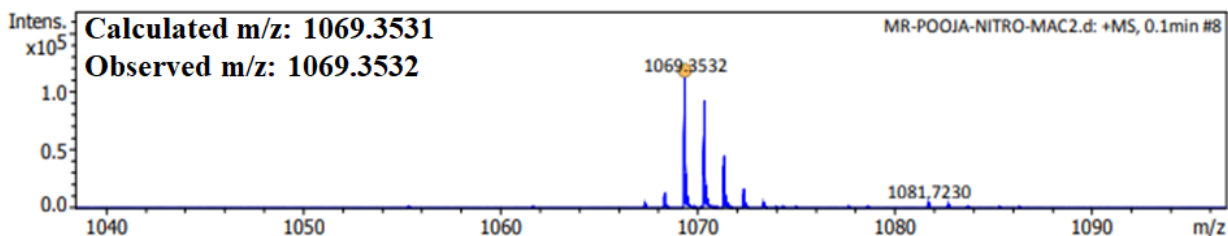

| Meas. m/z | # | Ion Formula | m/z       | err [ppm] | mSigma | # mSigma | Score  | rdb  | e <sup>-</sup> Conf | N-Rule |
|-----------|---|-------------|-----------|-----------|--------|----------|--------|------|---------------------|--------|
| 1069.3532 | 1 | C70H49N6O4S | 1069.3531 | -0.1      | 24.6   | 1        | 100.00 | 52.0 | even                | ok     |

Figure S27. HR mass spectrum of the compound 8

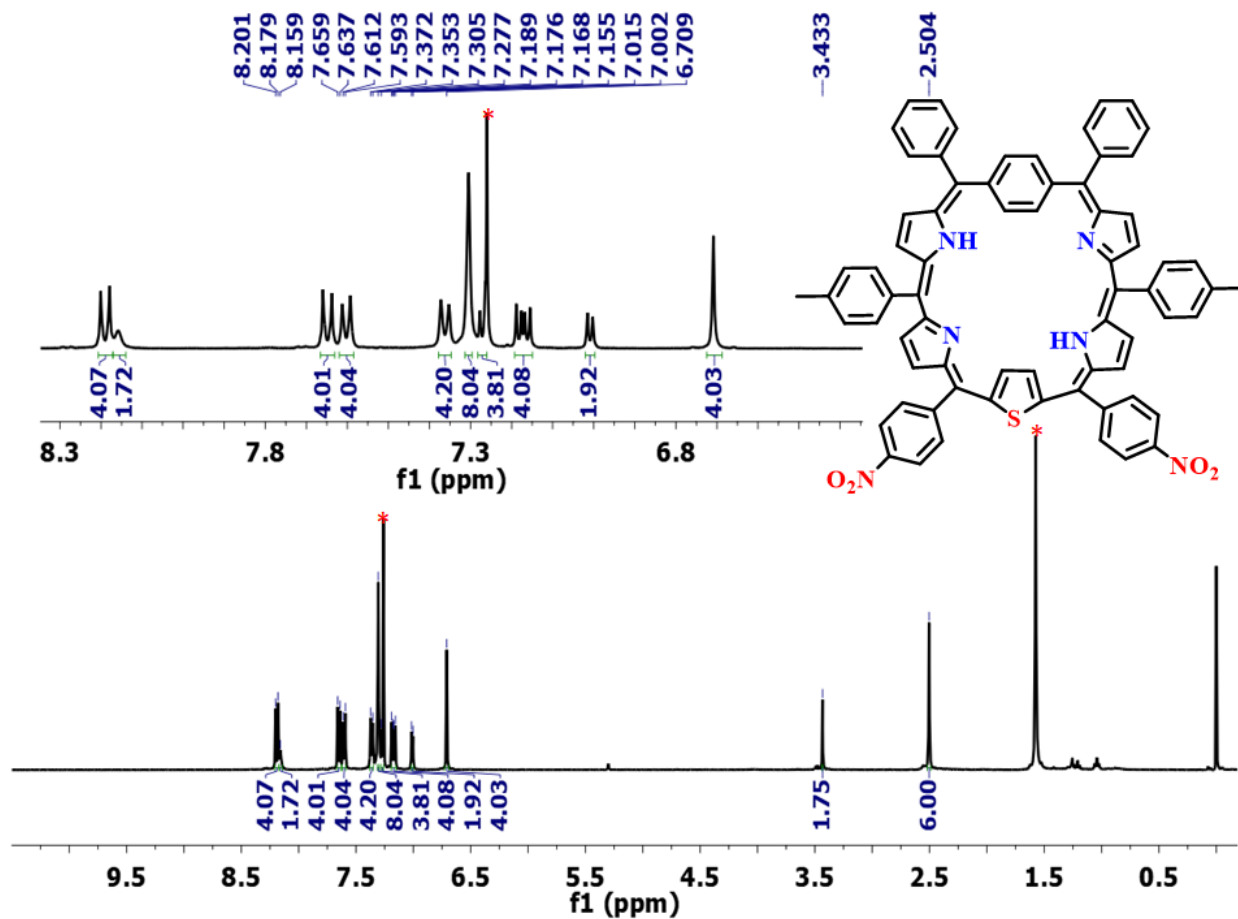

**Figure S28.**  $^1\text{H}$  NMR spectrum of the compound **8** recorded in  $\text{CDCl}_3$  at 298 K on 400 MHz NMR instrument. Note: Peaks marked with asterisk (\*) are due to residual solvents.

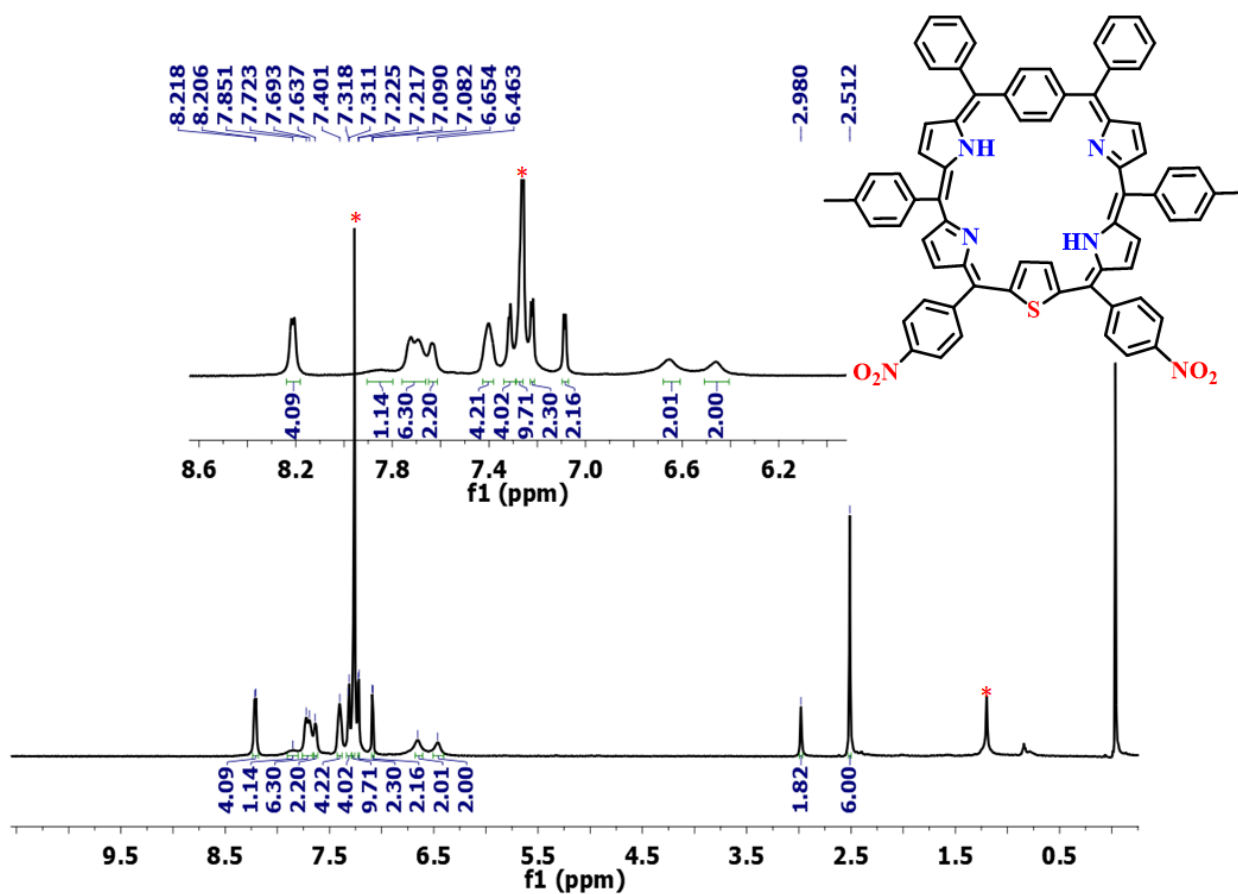

**Figure S29.**  $^1\text{H}$  NMR spectrum of the compound **8** recorded in  $\text{CDCl}_3$  at 223 K on 600 MHz NMR instrument. Note: Peaks marked with asterisk (\*) are due to residual solvents.

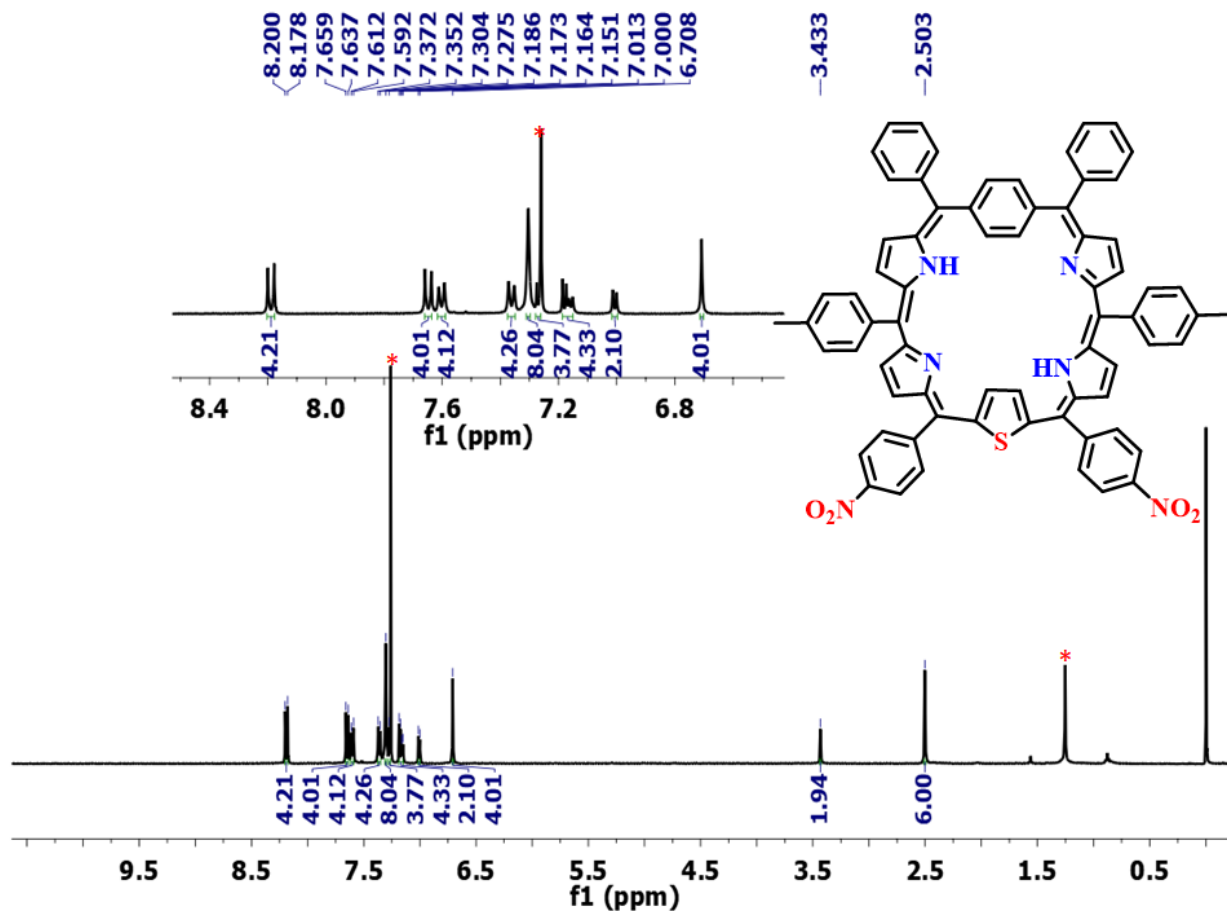

**Figure S30.**  $^1\text{H}$  NMR spectrum of the compound **8** recorded upon addition of  $\text{D}_2\text{O}$  in  $\text{CDCl}_3$  at 25  $^\circ\text{C}$  on 400 MHz NMR instrument. Note: Peaks marked with asterisk (\*) are due to residual solvents.

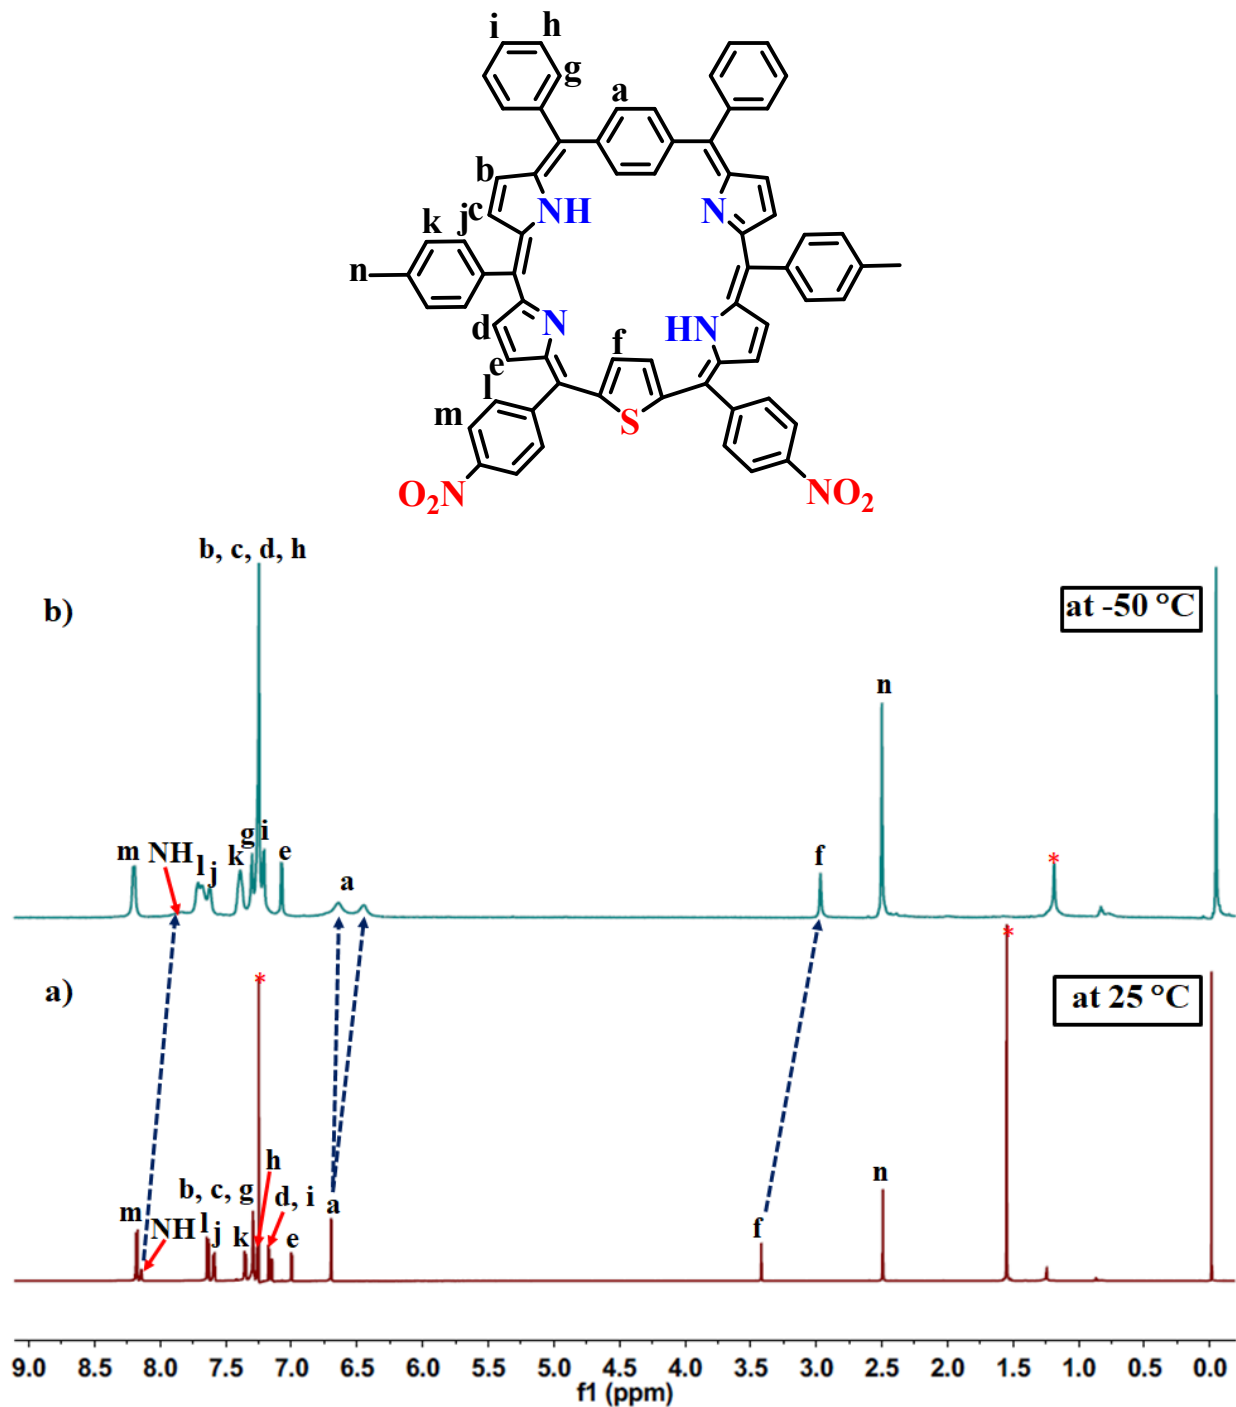

**Figure S31.** Comparison of <sup>1</sup>H NMR spectrum of the compound **8** recorded in CDCl<sub>3</sub> at 298K (a) and 223 K (b) on 600 MHz NMR instrument. Note: Peaks marked with asterisk (\*) are due to residual solvents.



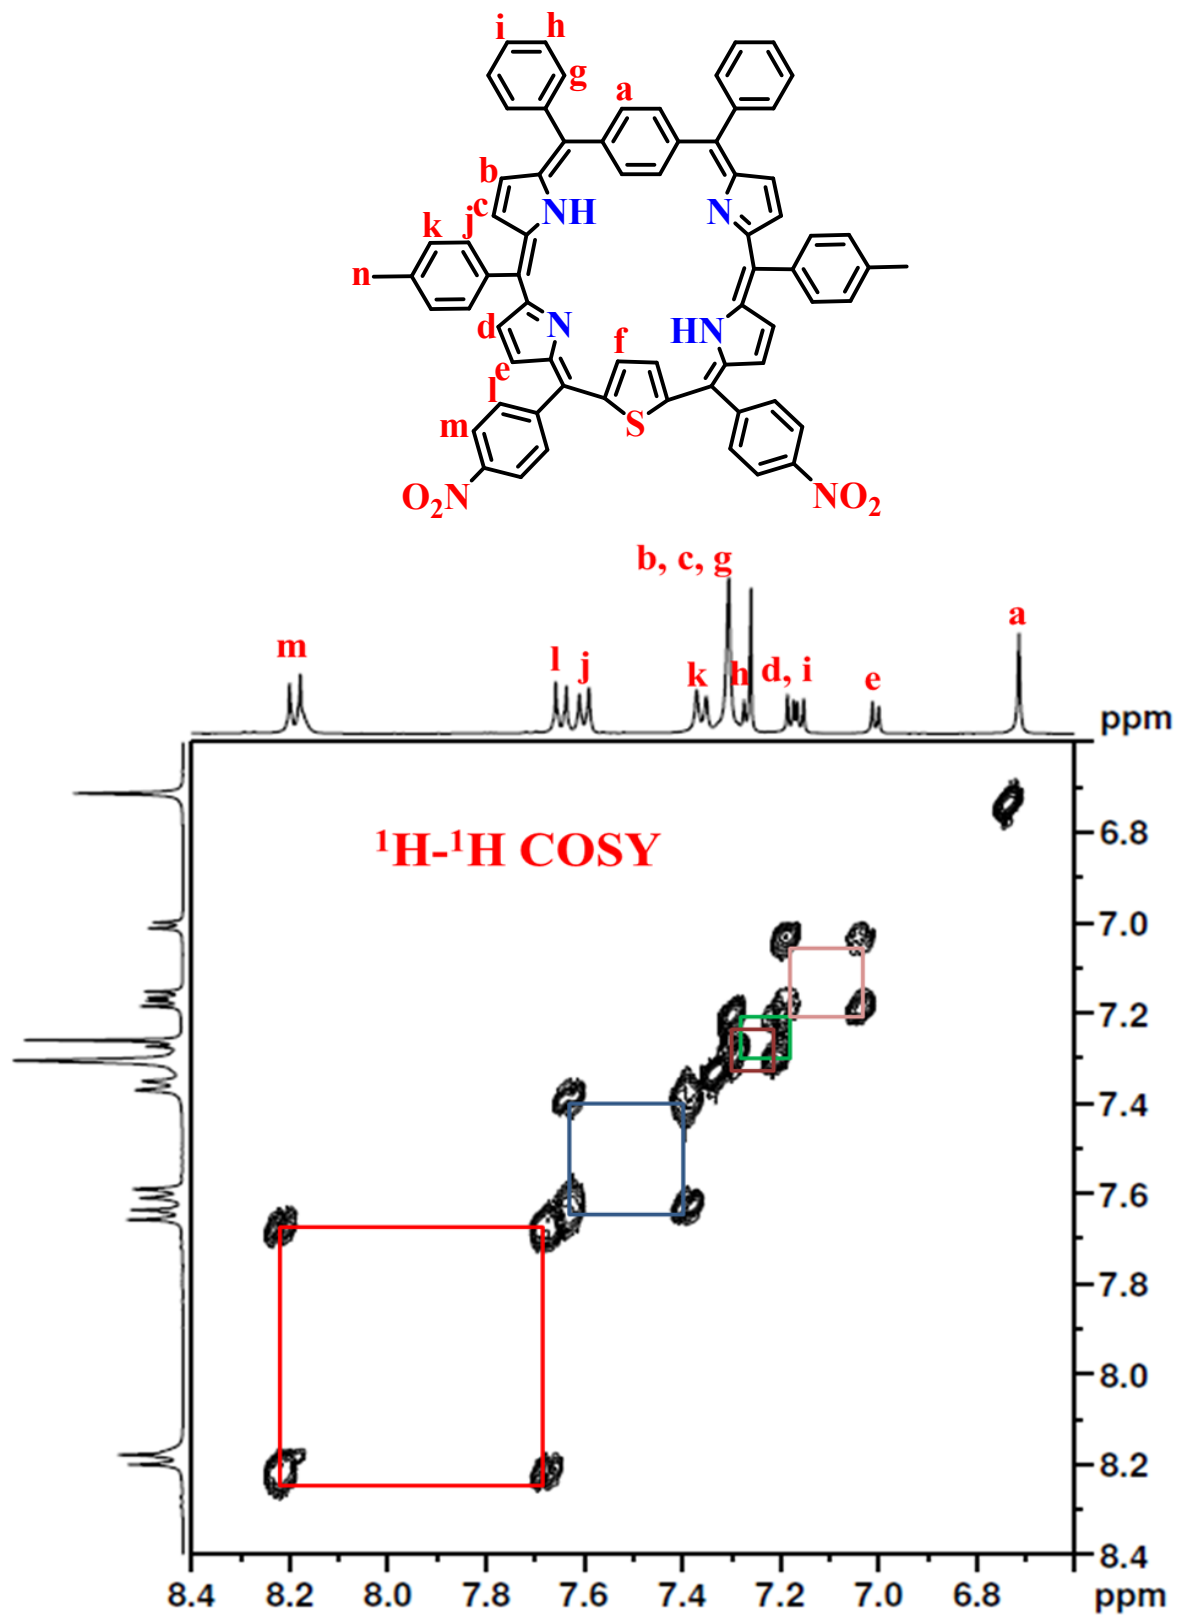

Figure S32.  $^1\text{H}$ - $^1\text{H}$  COSY of compound **8** recorded in  $\text{CDCl}_3$  at 25 °C.

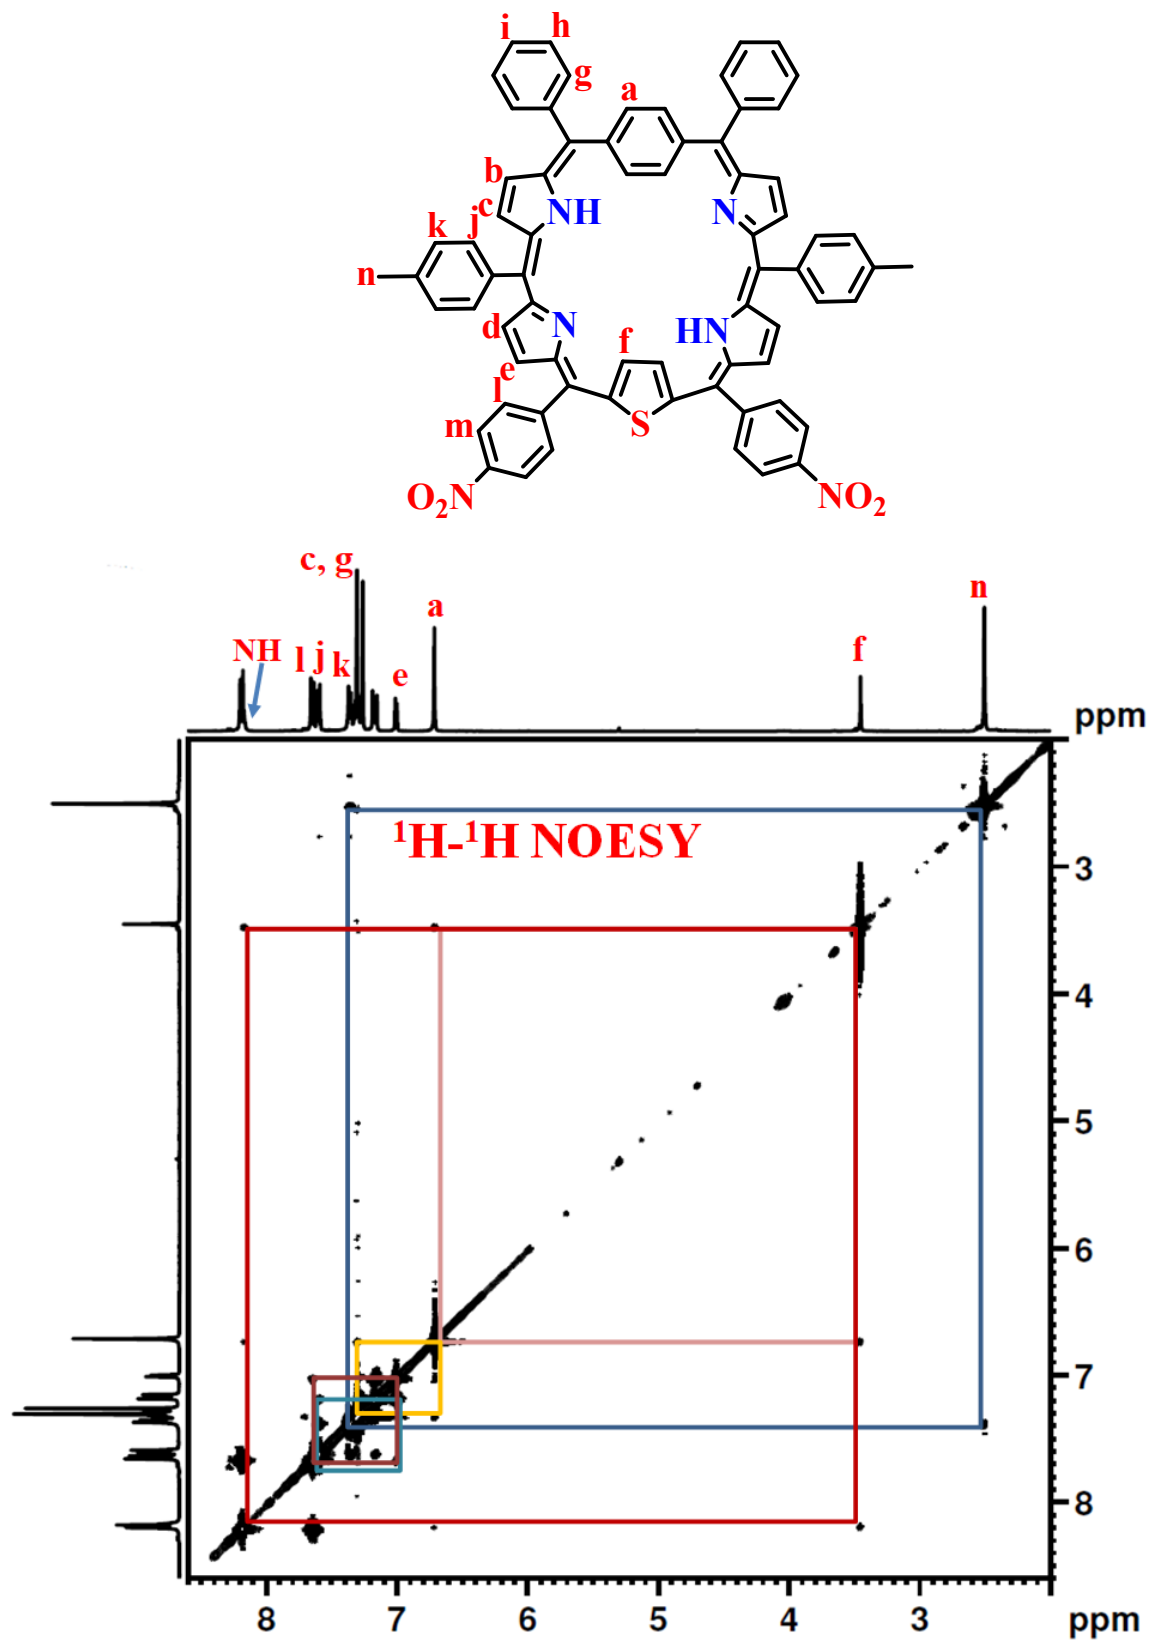

Figure S33.  $^1\text{H}$ - $^1\text{H}$  NOESY of compound 8 recorded in  $\text{CDCl}_3$  at 25 °C.

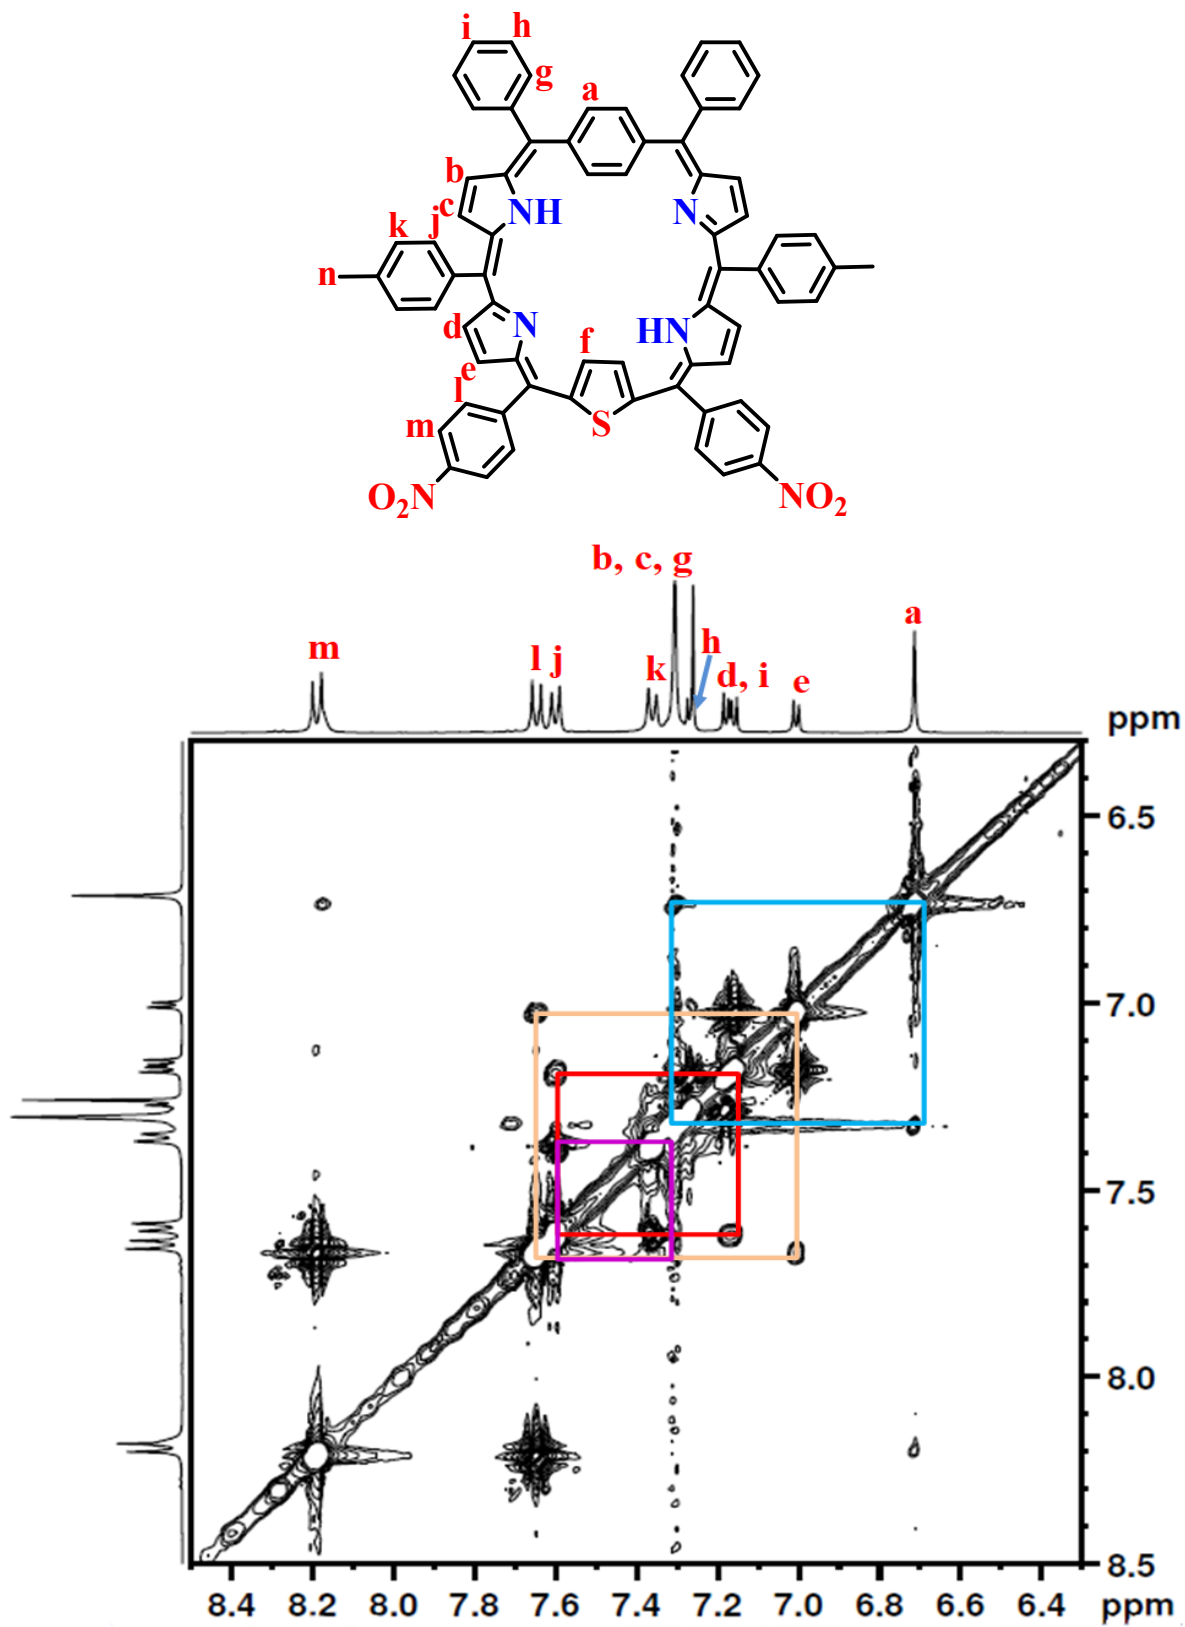

Figure S34. Expanded  $^1\text{H}$ - $^1\text{H}$  NOESY of compound **8** recorded in  $\text{CDCl}_3$  at 25  $^\circ\text{C}$ .

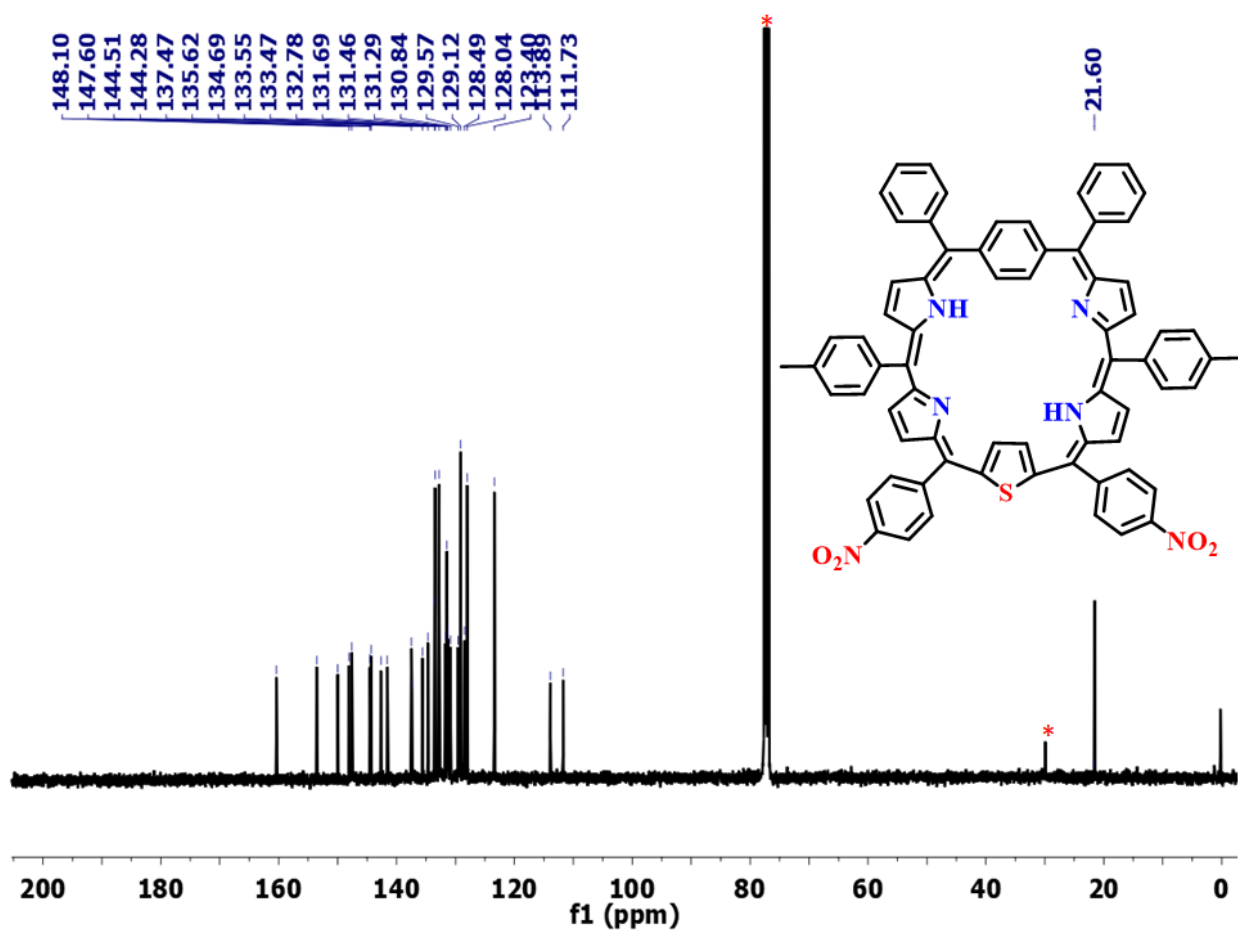

**Figure S35.**  $^{13}\text{C}\{^1\text{H}\}$  NMR spectrum of the compound **8** recorded in  $\text{CDCl}_3$  on 400 MHz NMR instrument. Note: Peaks marked with asterisk (\*) are due to residual solvents.

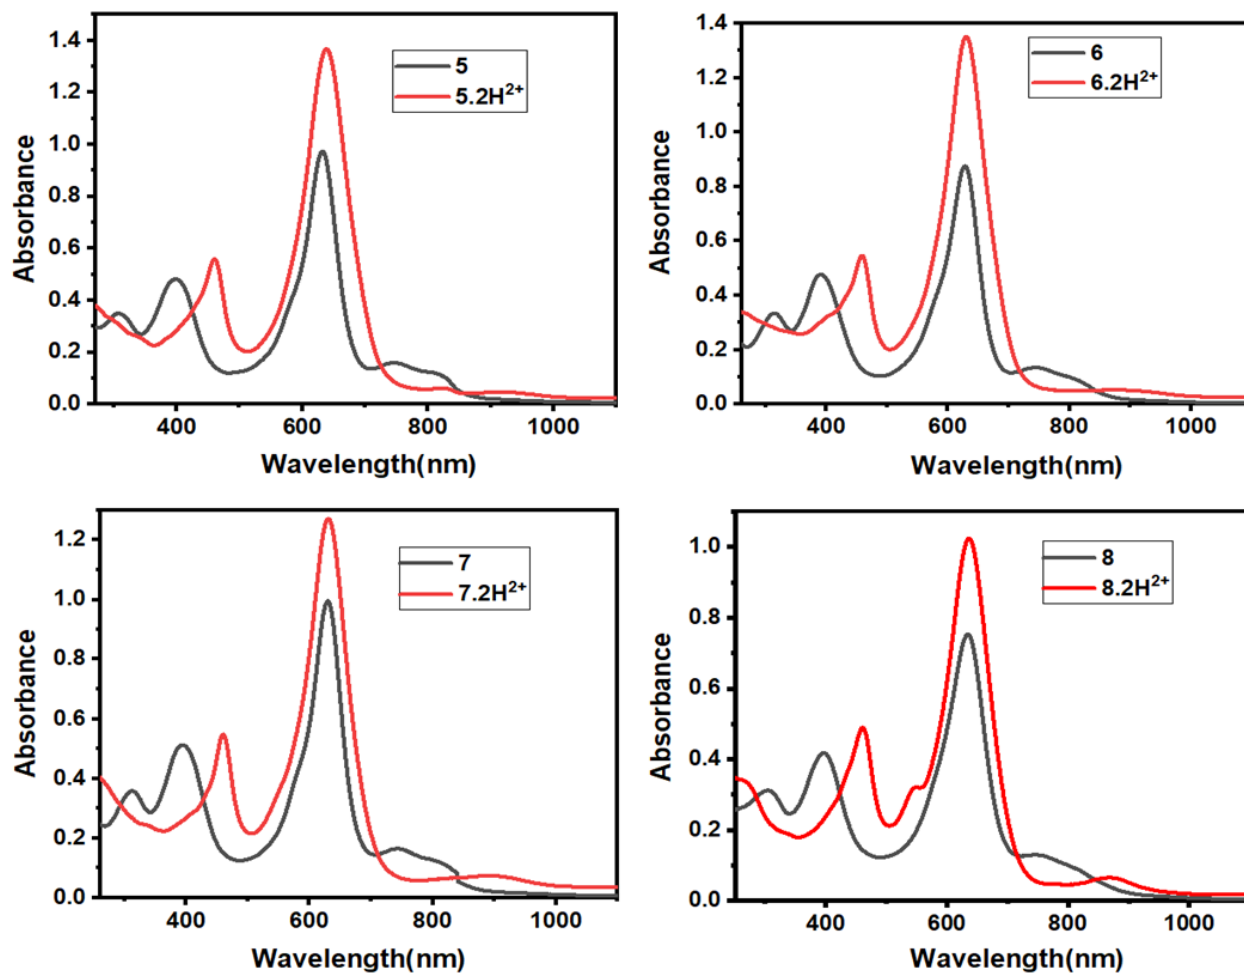

**Figure S36.** Comparison of absorption spectra of the compounds **5-8** ( $8 \cdot 10^{-6}$  M) free base (black line) and in presence of TFA (excess) (red line) recorded in chloroform at room temperature.

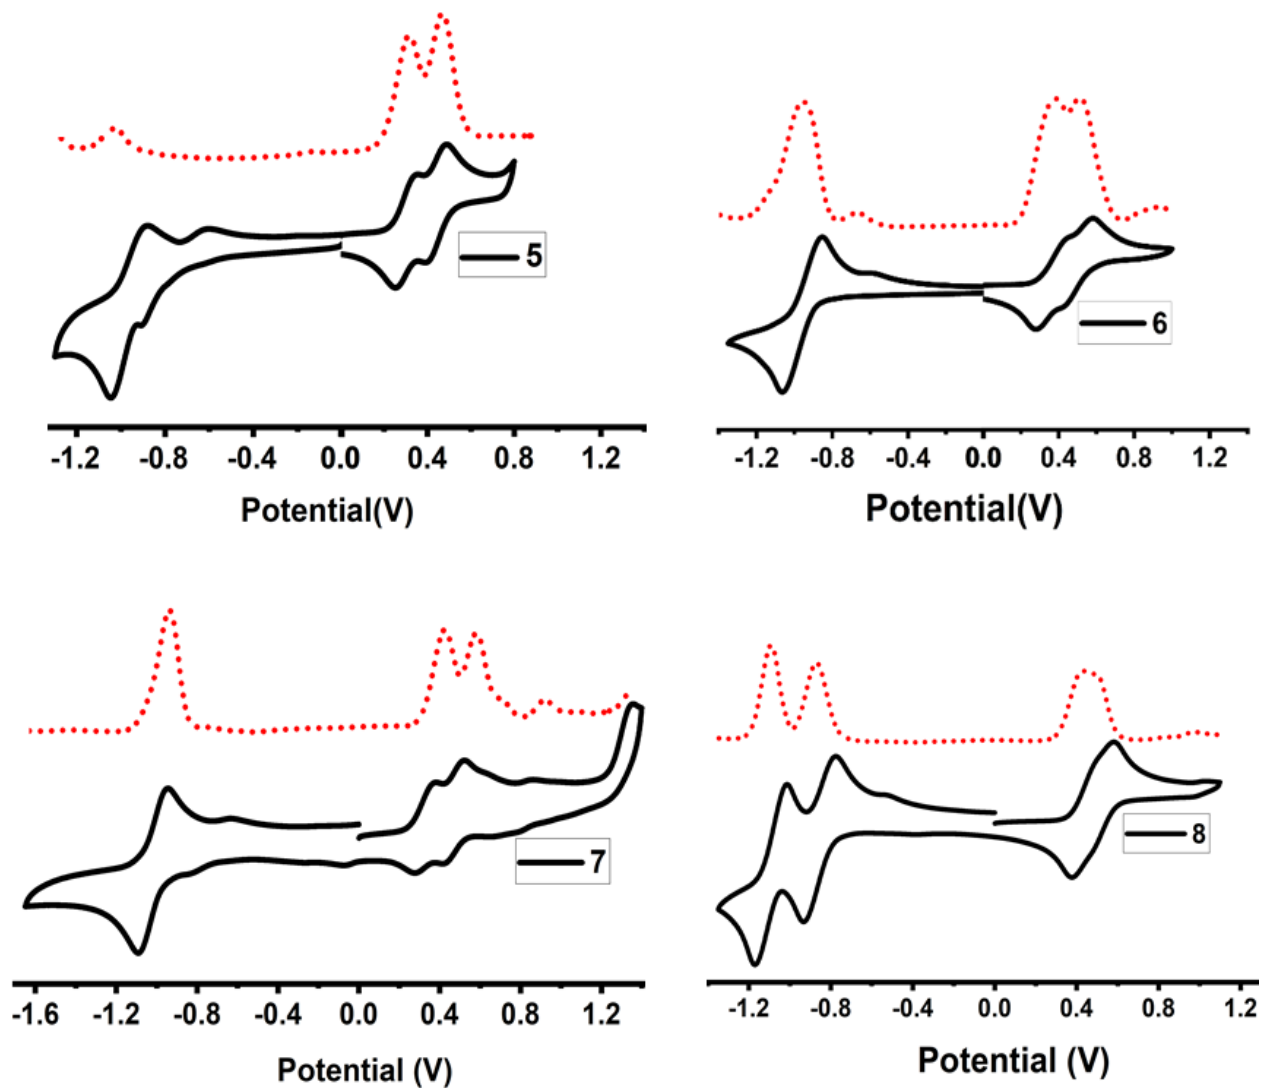

**Figure S37.** Comparison of cyclic voltammograms (black solid lines) along with differential pulse voltammograms (red dotted lines) of the compounds **5-8** recorded in  $\text{CH}_2\text{Cl}_2$  containing 0.1 M TBAP as the supporting electrolyte and a saturated calomel electrode (SCE) as the reference electrode at scan rates of  $50 \text{ mV s}^{-1}$ .

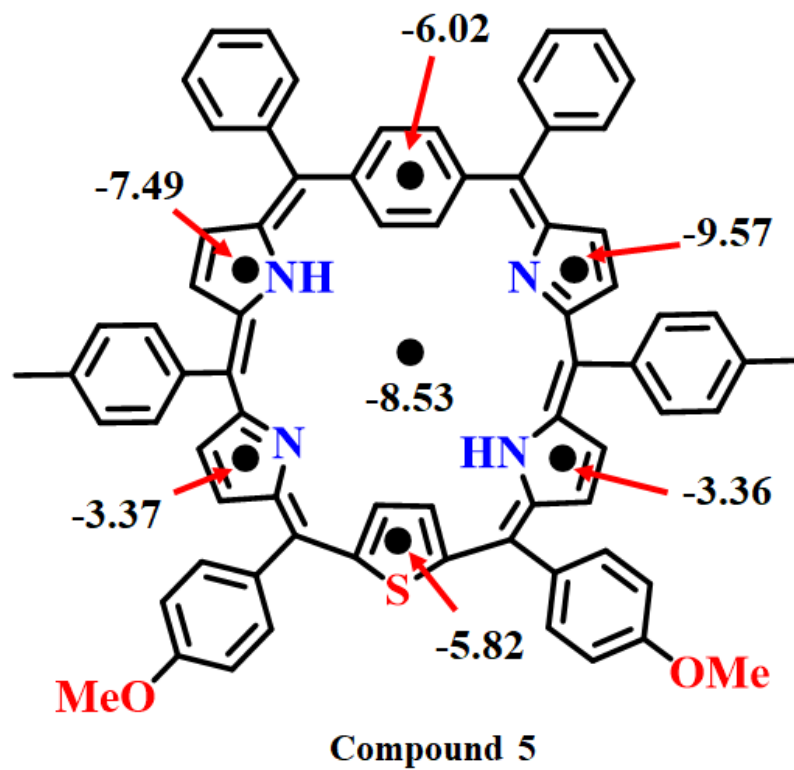

**Figure S38.** NICS(0) values of compound **5** on the optimized structures (B3LYP/6-31G (d, p)) (black dots represent the Bq atoms).

**Figure S39.** NICS(0) values of compounds (a) **6** (b) **7** and (c) **8** on the optimized structures (B3LYP/6-31G (d, p) at the centre of the macrocycle (black dots represent the Bq atoms).



**Table S1.** Selected TD-DFT calculated oscillator strengths and compositions of the major electronic transitions of **5**.

| Wavelength (nm) | Osc. Strength | Major Contributions                                             | Minor Contributions                              |
|-----------------|---------------|-----------------------------------------------------------------|--------------------------------------------------|
| 1161.436        | 0.0741        | H-1->L+1 (10%), HOMO->LUMO (84%)                                | HOMO->L+1 (3%)                                   |
| 1038.126        | 0.1463        | H-1->LUMO (50%), HOMO->L+1 (43%)                                | HOMO->LUMO (4%)                                  |
| 1025.249        | 0.0787        | H-1->LUMO (44%), HOMO->L+1 (52%)                                |                                                  |
| 909.4355        | 0.4652        | H-1->L+1 (83%), HOMO->LUMO (10%)                                | HOMO->L+3 (4%)                                   |
| 815.8409        | 0.0194        | H-1->L+2 (32%), HOMO->L+3 (60%)                                 | H-1->L+1 (4%)                                    |
| 795.2238        | 0.0714        | H-1->L+3 (27%), HOMO->L+2 (67%)                                 | H-1->LUMO (2%)                                   |
| 654.6111        | 0.9761        | H-1->L+2 (15%), H-1->L+3 (53%), HOMO->L+2 (19%)                 | HOMO->L+1 (2%), HOMO->L+3 (9%)                   |
| 640.0131        | 0.5563        | H-1->L+2 (50%), H-1->L+3 (15%), HOMO->L+3 (23%)                 | HOMO->L+2 (9%)                                   |
| 514.2616        | 0.007         | H-2->LUMO (92%)                                                 | HOMO->L+4 (3%)                                   |
| 497.2261        | 0.0164        | H-14->L+1 (15%), H-2->L+1 (20%)                                 | H-24->L+1 (4%), H-19->LUMO (2%), H-17->LUMO (2%) |
| 493.3089        | 0.0293        | H-2->L+1 (52%), HOMO->L+4 (11%)                                 | H-16->L+1 (2%), H-14->LUMO (6%), H-14->L+1 (8%)  |
| 478.6817        | 0.0463        | H-3->LUMO (33%), H-2->L+1 (14%)                                 | H-24->LUMO (5%), H-20->LUMO (2%)                 |
| 475.214         | 0.109         | HOMO->L+4 (30%)                                                 | H-24->LUMO (5%), H-24->L+1 (4%)                  |
| 469.9721        | 0.0365        | H-1->L+4 (21%), HOMO->L+5 (64%)                                 | HOMO->L+4 (7%)                                   |
| 465.5078        | 0.2371        | H-3->LUMO (46%), HOMO->L+4 (15%)                                | H-24->L+1 (2%), H-19->LUMO (3%), H-14->L+1 (2%)  |
| 459.0785        | 0.0276        | H-4->LUMO (12%), H-3->L+1 (55%), H-1->L+4 (14%)                 | H-3->L+2 (2%), H-1->L+5 (2%), HOMO->L+4 (2%)     |
| 449.5733        | 0.0067        | H-4->LUMO (33%), H-1->L+4 (21%)                                 | H-6->LUMO (6%), H-5->LUMO (6%), H-4->L+1 (7%)    |
| 444.0505        | 0.0074        | H-4->LUMO (14%), H-3->L+1 (26%), H-2->L+3 (14%), H-1->L+4 (24%) | HOMO->L+5 (9%)                                   |
| 435.2431        | 0.2087        | H-1->L+5 (66%)                                                  | H-6->LUMO (3%), H-5->LUMO (2%), H-4->LUMO (3%)   |

|          |        |                                                  |                                                |
|----------|--------|--------------------------------------------------|------------------------------------------------|
| 431.0515 | 0.0057 | H-6->LUMO (45%), H-5->LUMO (24%)                 | H-6->L+1 (3%), H-6->L+3 (5%), H-5->L+3 (2%)    |
| 424.0486 | 0.0279 | H-5->LUMO (39%), H-4->LUMO (20%), H-4->L+1 (14%) | H-6->LUMO (6%), H-5->L+1 (3%), H-2->L+2 (2%)   |
| 420.6961 | 0.0399 | H-4->L+1 (53%)                                   | H-7->LUMO (5%), H-6->LUMO (4%), H-5->LUMO (9%) |
| 418.2268 | 0.1484 | H-6->LUMO (12%), H-2->L+2 (28%)                  | H-7->LUMO (2%), H-6->L+1 (3%), H-5->LUMO (9%)  |
| 413.6363 | 0.392  | H-7->LUMO (17%), H-2->L+2 (20%), H-2->L+3 (26%)  | H-6->LUMO (9%), H-5->L+1 (3%), H-3->L+2 (6%)   |
| 409.3886 | 0.1291 | H-6->L+1 (37%), H-5->L+1 (37%)                   | H-6->LUMO (4%), H-2->L+2 (8%), H-2->L+3 (5%)   |
| 406.6094 | 0.0933 | H-7->LUMO (38%), H-6->L+1 (27%)                  | H-5->LUMO (3%), H-5->L+1 (7%), H-3->L+2 (4%)   |
| 403.6573 | 0.2589 | H-7->LUMO (21%), H-6->L+1 (15%), H-5->L+1 (39%)  | H-4->L+1 (9%), H-2->L+2 (2%)                   |
| 395.5821 | 0.0216 | H-7->L+1 (68%)                                   | H-10->LUMO (4%), H-6->L+1 (4%), H-3->L+2 (8%)  |

**Table S2.**  $S_0$  optimized geometry of the compound **5** at B3LYP/TZVP level of theory and

Empirical Dispersion GD2.

# Sum of imaginary frequencies= 0

# Total Energy (hartree) = -3544.989570

| Atom | X        | Y        | Z        | Atom | X        | Y        | Z        |
|------|----------|----------|----------|------|----------|----------|----------|
| C    | 1.021171 | -2.98043 | 1.126557 | C    | 1.180113 | 3.883352 | -2.99709 |
| C    | 1.384727 | -2.99798 | -0.24024 | C    | -4.67143 | 1.754248 | 2.064264 |
| C    | 0.437895 | -3.08218 | -1.23582 | C    | -5.64477 | 0.922047 | 1.622955 |
| C    | -0.94463 | -3.12049 | -0.94828 | C    | -5.03687 | 0.09325  | 0.592762 |
| C    | -1.30906 | -3.0585  | 0.41764  | N    | -3.73132 | 0.390965 | 0.448122 |
| C    | -0.36117 | -3.00992 | 1.415141 | N    | 3.73205  | 0.456344 | -0.64159 |
| C    | -1.92656 | -3.31594 | -1.99967 | C    | 5.07673  | 0.172143 | -0.69621 |
| C    | 2.015206 | -3.03598 | 2.181325 | C    | 5.648974 | 1.105945 | -1.62734 |
| C    | -1.55747 | -4.0788  | -3.2066  | C    | 4.657936 | 1.929547 | -2.0664  |
| C    | -3.23174 | -2.86148 | -1.87781 | O    | -2.28556 | 7.20245  | 3.908845 |
| C    | 3.303679 | -2.53802 | 2.008088 | C    | -1.23765 | 7.562315 | 4.80069  |
| C    | 1.682379 | -3.7142  | 3.447527 | O    | 2.083268 | 7.338225 | -3.90656 |
| C    | -0.76648 | -5.23552 | -3.1161  | C    | 1.056477 | 7.666164 | -4.83426 |
| C    | -0.43633 | -5.96579 | -4.24929 | H    | 2.43142  | -2.97207 | -0.501   |
| C    | -0.88445 | -5.55678 | -5.50464 | H    | 0.759077 | -3.13267 | -2.26777 |
| C    | -1.66347 | -4.40803 | -5.61307 | H    | -2.35354 | -3.09595 | 0.691796 |
| C    | -1.99288 | -3.67557 | -4.47835 | H    | -0.6828  | -3.00046 | 2.448068 |

|   |          |          |          |   |          |          |          |
|---|----------|----------|----------|---|----------|----------|----------|
| C | 2.10593  | -3.18203 | 4.675068 | H | -0.42165 | -5.5601  | -2.14294 |
| C | 1.818365 | -3.82895 | 5.871213 | H | 0.16767  | -6.8602  | -4.15384 |
| C | 1.099812 | -5.0215  | 5.867253 | H | -0.62357 | -6.12518 | -6.38901 |
| C | 0.667143 | -5.56033 | 4.656284 | H | -2.00477 | -4.07315 | -6.58538 |
| C | 0.950559 | -4.91254 | 3.461958 | H | -2.57824 | -2.76952 | -4.56796 |
| C | 4.501369 | -3.01481 | 2.689295 | H | 2.649586 | -2.24637 | 4.677593 |
| C | 5.556016 | -2.45431 | 2.048371 | H | 2.147483 | -3.39632 | 6.808418 |
| C | 4.996828 | -1.57273 | 1.030267 | H | 0.873916 | -5.52529 | 6.799226 |
| N | 3.65334  | -1.64181 | 1.034791 | H | 0.112144 | -6.49073 | 4.644192 |
| N | -3.65697 | -1.9059  | -0.98274 | H | 0.621156 | -5.338   | 2.522977 |
| C | -5.0226  | -1.77518 | -1.00135 | H | 4.51798  | -3.74616 | 3.481336 |
| C | -5.49973 | -2.70861 | -1.98652 | H | 6.605385 | -2.62388 | 2.227299 |
| C | -4.42229 | -3.34086 | -2.53301 | H | -3.09777 | -1.20407 | -0.49837 |
| C | 5.720482 | -0.75896 | 0.116615 | H | -6.53866 | -2.85862 | -2.2275  |
| C | -5.72103 | -0.87963 | -0.19652 | H | -4.42675 | -4.11919 | -3.27775 |
| C | -7.19837 | -0.92702 | -0.18063 | H | 7.53322  | -0.33502 | 2.091983 |
| C | 7.197648 | -0.86684 | 0.040454 | H | 9.987435 | -0.51338 | 1.957197 |
| C | 8.001722 | -0.62048 | 1.158461 | H | 9.682516 | -1.56704 | -2.17813 |
| C | 9.385663 | -0.71831 | 1.078322 | H | 7.225961 | -1.41049 | -2.03441 |
| C | 10.01757 | -1.06184 | -0.11851 | H | -7.31614 | -3.04394 | 0.154425 |
| C | 9.215998 | -1.29942 | -1.23622 | H | -9.77757 | -3.12553 | 0.156644 |
| C | 7.83098  | -1.20798 | -1.15913 | H | -9.91562 | 1.102364 | -0.48574 |
| C | -7.88421 | -2.13496 | 0.00181  | H | -7.45289 | 1.178384 | -0.50796 |
| C | -9.27253 | -2.17708 | 0.008567 | H | 11.88322 | -0.97819 | -1.198   |
| C | -10.0307 | -1.01645 | -0.15882 | H | 12.01008 | -0.52753 | 0.51147  |
| C | -9.34932 | 0.188841 | -0.34027 | H | 11.82653 | -2.22147 | 0.052961 |
| C | -7.96116 | 0.235563 | -0.35114 | H | -11.972  | -0.24805 | -0.69913 |
| C | 11.51592 | -1.2003  | -0.19339 | H | -11.9166 | -2.00811 | -0.49653 |
| C | -11.5357 | -1.05917 | -0.11165 | H | -11.8969 | -0.95263 | 0.91707  |
| C | 1.059604 | 1.831083 | -0.71536 | H | 1.102395 | -0.35084 | -0.71748 |
| C | 0.596848 | 0.55141  | -0.40544 | H | -1.10653 | -0.37003 | 0.612811 |
| C | -0.60943 | 0.535114 | 0.301245 | H | -0.45817 | 3.102652 | 3.049766 |
| C | -1.11109 | 1.797169 | 0.606836 | H | -0.40351 | 5.251114 | 4.224398 |
| S | -0.041   | 3.037082 | -0.05161 | H | -4.03187 | 6.417312 | 2.253286 |
| C | 2.23272  | 2.264327 | -1.41028 | H | -4.08576 | 4.229487 | 1.086311 |
| C | -2.29675 | 2.184801 | 1.304862 | H | 3.905519 | 4.395713 | -1.06641 |
| C | -3.47552 | 1.440628 | 1.293533 | H | 3.792803 | 6.602438 | -2.19051 |
| C | -2.28298 | 3.495238 | 1.994452 | H | 0.318921 | 5.302123 | -4.34629 |
| C | -1.24692 | 3.823079 | 2.874464 | H | 0.436925 | 3.128667 | -3.2217  |
| C | -1.21386 | 5.041949 | 3.541026 | H | -4.73807 | 2.498072 | 2.841124 |
| C | -2.22726 | 5.977902 | 3.317829 | H | -6.666   | 0.85324  | 1.961268 |
| C | -3.26395 | 5.674915 | 2.429284 | H | 3.139296 | -0.07166 | -0.00127 |
| C | -3.28824 | 4.452816 | 1.7823   | H | 6.691702 | 1.131893 | -1.89515 |

|   |          |          |          |   |          |          |          |
|---|----------|----------|----------|---|----------|----------|----------|
| C | 3.429819 | 1.56428  | -1.40465 | H | 4.745351 | 2.740443 | -2.76909 |
| C | 2.189801 | 3.589105 | -2.07729 | H | -1.47252 | 8.566225 | 5.149429 |
| C | 3.130246 | 4.591966 | -1.79562 | H | -1.19228 | 6.87658  | 5.653788 |
| C | 3.073104 | 5.826432 | -2.41792 | H | -0.26879 | 7.565576 | 4.289602 |
| C | 2.062479 | 6.097749 | -3.34552 | H | 1.25414  | 8.688466 | -5.15126 |
| C | 1.110392 | 5.11697  | -3.63441 | H | 1.081079 | 6.999309 | -5.70311 |
|   |          |          |          | H | 0.068308 | 7.609168 | -4.36492 |

**Table S3.**  $S_0$  optimized geometry of the compound **5** at B3LYP/6-31G (d, p) level of theory and Empirical Dispersion GD2.

# Sum of imaginary frequencies= 0

# Total Energy (hartree) = -3543.865656

| Atom | X       | Y       | Z       | Atom | X       | Y       | Z       |
|------|---------|---------|---------|------|---------|---------|---------|
| C    | 0.9616  | -3.102  | 1.1601  | C    | 1.1692  | 3.6738  | -3.0048 |
| C    | 1.3712  | -3.1228 | -0.1985 | C    | -4.6944 | 1.587   | 1.9893  |
| C    | 0.4529  | -3.211  | -1.2275 | C    | -5.669  | 0.7688  | 1.5185  |
| C    | -0.9411 | -3.2598 | -0.9799 | C    | -5.0461 | -0.0577 | 0.4879  |
| C    | -1.3518 | -3.2051 | 0.3779  | N    | -3.7289 | 0.227   | 0.3706  |
| C    | -0.4327 | -3.1423 | 1.4084  | N    | 3.7506  | 0.2905  | -0.5817 |
| C    | -1.8928 | -3.4556 | -2.0653 | C    | 5.097   | -0.0115 | -0.6047 |
| C    | 1.9254  | -3.1503 | 2.2496  | C    | 5.6999  | 0.8992  | -1.5453 |
| C    | -1.4896 | -4.212  | -3.2671 | C    | 4.7246  | 1.726   | -2.0216 |
| C    | -3.2052 | -2.9992 | -1.9742 | H    | 2.4281  | -3.092  | -0.4257 |
| C    | 3.2256  | -2.6583 | 2.1072  | H    | 0.8053  | -3.2571 | -2.2521 |
| C    | 1.555   | -3.8155 | 3.5149  | H    | -2.4066 | -3.2561 | 0.619   |
| C    | -0.6627 | -5.3489 | -3.164  | H    | -0.7862 | -3.1318 | 2.4333  |
| C    | -0.3007 | -6.0747 | -4.296  | H    | -0.3183 | -5.6625 | -2.1841 |
| C    | -0.754  | -5.6821 | -5.5598 | H    | 0.33    | -6.9527 | -4.1923 |
| C    | -1.5695 | -4.554  | -5.6804 | H    | -0.469  | -6.2474 | -6.4422 |
| C    | -1.9292 | -3.824  | -4.5483 | H    | -1.9147 | -4.2329 | -6.6588 |
| C    | 1.973   | -3.2827 | 4.7503  | H    | -2.5401 | -2.9326 | -4.646  |
| C    | 1.6513  | -3.9182 | 5.9487  | H    | 2.5383  | -2.3568 | 4.7558  |
| C    | 0.9028  | -5.0981 | 5.9387  | H    | 1.9764  | -3.4867 | 6.8908  |
| C    | 0.476   | -5.6375 | 4.7207  | H    | 0.6497  | -5.5919 | 6.8723  |
| C    | 0.7951  | -5.0027 | 3.523   | H    | -0.1004 | -6.5578 | 4.7049  |
| C    | 4.4009  | -3.1413 | 2.8273  | H    | 0.474   | -5.4297 | 2.5787  |
| C    | 5.4815  | -2.6009 | 2.2028  | H    | 4.3871  | -3.8657 | 3.6293  |
| C    | 4.9555  | -1.7255 | 1.1592  | H    | 6.5266  | -2.7802 | 2.4099  |
| N    | 3.6083  | -1.7743 | 1.1283  | H    | -3.0982 | -1.3475 | -0.575  |

|   |         |         |         |   |         |         |         |
|---|---------|---------|---------|---|---------|---------|---------|
| N | -3.648  | -2.0456 | -1.0807 | H | -6.5107 | -2.9793 | -2.4007 |
| C | -5.0124 | -1.9105 | -1.1309 | H | -4.3727 | -4.2481 | -3.4126 |
| C | -5.4741 | -2.8354 | -2.1357 | H | 7.4931  | -0.598  | 2.275   |
| C | -4.3833 | -3.4716 | -2.6621 | H | 9.9538  | -0.82   | 2.1865  |
| C | 5.7145  | -0.9347 | 0.2416  | H | 9.7212  | -1.7481 | -1.9965 |
| C | -5.7268 | -1.0163 | -0.3234 | H | 7.2565  | -1.5545 | -1.901  |
| C | -7.2061 | -1.0605 | -0.3316 | H | -7.3321 | -3.1985 | -0.1001 |
| C | 7.1925  | -1.0674 | 0.1947  | H | -9.8018 | -3.2739 | -0.1411 |
| C | 7.9781  | -0.8672 | 1.3419  | H | -9.9249 | 0.9936  | -0.5745 |
| C | 9.3656  | -0.9883 | 1.2878  | H | -7.454  | 1.0659  | -0.5655 |
| C | 10.0193 | -1.3087 | 0.0903  | H | 11.9135 | -1.216  | -0.9476 |
| C | 9.2364  | -1.4999 | -1.0556 | H | 12.0097 | -0.8299 | 0.7847  |
| C | 7.8477  | -1.3868 | -1.0059 | H | 11.8109 | -2.5052 | 0.2573  |
| C | -7.8982 | -2.2798 | -0.2171 | H | -11.983 | -0.3546 | -0.9013 |
| C | -9.2906 | -2.3188 | -0.2338 | H | -11.931 | -2.1254 | -0.7551 |
| C | -10.047 | -1.145  | -0.3537 | H | -11.936 | -1.1139 | 0.6942  |
| C | -9.3596 | 0.0712  | -0.4663 | H | 1.1184  | -0.5349 | -0.7829 |
| C | -7.9672 | 0.1157  | -0.4574 | H | -1.1077 | -0.5676 | 0.5534  |
| C | 11.5193 | -1.4685 | 0.0424  | H | -0.4267 | 2.8095  | 3.0627  |
| C | -11.555 | -1.1874 | -0.3333 | H | -0.3634 | 4.9552  | 4.3332  |
| C | 1.0834  | 1.6487  | -0.7323 | H | -3.9852 | 6.2106  | 2.4032  |
| C | 0.614   | 0.3632  | -0.4493 | H | -4.0567 | 4.0616  | 1.1347  |
| C | -0.601  | 0.3406  | 0.2578  | H | 4.0108  | 4.1877  | -1.2032 |
| C | -1.0907 | 1.6042  | 0.5887  | H | 3.905   | 6.3632  | -2.4158 |
| S | -0.0069 | 2.8438  | -0.0405 | H | 0.3002  | 5.103   | -4.3738 |
| C | 2.2729  | 2.086   | -1.4155 | H | 0.4028  | 2.9238  | -3.1669 |
| C | -2.2874 | 1.991   | 1.2847  | H | -4.7708 | 2.3238  | 2.7758  |
| C | -3.4832 | 1.2687  | 1.2316  | H | -6.7008 | 0.7076  | 1.8338  |
| C | -2.2585 | 3.2766  | 2.025   | H | 3.1387  | -0.2147 | 0.0623  |
| C | -1.2044 | 3.5516  | 2.9199  | H | 6.7498  | 0.9068  | -1.7959 |
| C | -1.1597 | 4.7432  | 3.6313  | H | 4.837   | 2.5178  | -2.7464 |
| C | -2.1758 | 5.6808  | 3.4331  | O | -2.1349 | 6.9436  | 4.1769  |
| C | -3.2257 | 5.452   | 2.5433  | O | 2.0422  | 7.1132  | -4.1691 |
| C | -3.2592 | 4.2512  | 1.8434  | C | 2.99257 | 7.97634 | -3.9566 |
| C | 3.4781  | 1.3892  | -1.3676 | H | 3.93172 | 7.55022 | -4.2417 |
| C | 2.2293  | 3.3897  | -2.1191 | H | 2.81018 | 8.85746 | -4.5356 |
| C | 3.2121  | 4.3778  | -1.9106 | H | 3.01726 | 8.23104 | -2.9176 |
| C | 3.1588  | 5.5959  | -2.5781 | C | -3.094  | 7.80059 | 3.97938 |
| C | 2.104   | 5.8331  | -3.4603 | H | -4.0295 | 7.35791 | 4.25121 |
| C | 1.1023  | 4.8846  | -3.6805 | H | -2.9238 | 8.67075 | 4.57833 |
|   |         |         |         | H | -3.1175 | 8.07779 | 2.94617 |

---
